# Supplementary material for: Confirmation by IR of the preferred conformations of CFTA esters in solution: a highly reliable criterion for the stereochemistry assignment of chiral alcohols
Source: Royal Society of Chemistry journal article supplement (doi:10.1039/b926793j), 2010-01-01
Supplement: b926793j.pdf [file b926793j.pdf]

## *Supporting Information*

# **Confirmation by IR of the Preferred Conformations of CFTA Esters in Solution: A Highly Reliable Criterion for the Stereochemistry Assignment of Chiral Alcohols**

Kenji Omata,\* Kohsuke Kotani, Kuninobu Kabuto,  
Tomoya Fujiwara, and Yoshio Takeuchi\*

### **CONTENTS**

|                                                                                                                                             |            |
|---------------------------------------------------------------------------------------------------------------------------------------------|------------|
| <i>S-1. Typical Procedure for Preparation of <math>\alpha</math>-Cyano-<math>\alpha</math>-fluoro-<i>p</i>-tolylacetic Acid Derivatives</i> | <b>S1</b>  |
| <i>S-2. <math>^1\text{H}</math> and <math>^{13}\text{C}</math> NMR Spectra of New Compounds</i>                                             | <b>S5</b>  |
| <i>S-3. Structures of the CFTA esters examined and their <math>^1\text{H}</math> chemical shift differences</i>                             | <b>S15</b> |
| <i>S-4. IR measurement and curve-fitting</i>                                                                                                | <b>S16</b> |
| <i>S-5. Calculations.</i>                                                                                                                   |            |

---

[\*] Dr. K. Omata, K. Kotani, Prof. Dr. K. Kabuto  
Department of Chemistry, Graduate School of Science,  
Tohoku University  
6-3, Aoba, Aramaki, Aoba-ku, Sendai, 980-8578, (Japan)  
Fax: (+81) 22 795-7721  
E-mail: omata@he.tohoku.ac.jp

Dr. T. Fujiwara, Prof. Dr. Y. Takeuchi  
Graduate School of Medicine and Pharmaceutical Sciences for Research,  
University of Toyama  
Sugitani 2630, Toyama 930-0194 (Japan)

**S-1. Typical Procedure for Preparation of  $\alpha$ -Cyano- $\alpha$ -fluoro-*p*-tolylacetic Acid Derivatives**

In a 10 ml flask, (1*R*, 2*S*, 5*R*)-(-)-menthol (15.6 mg, 0.10 mmol) and pyridine (16.3  $\mu$ l, 0.20 mmol) were dissolved in dry dichloromethane (1 ml). To this solution, CFTA-Cl (19.6  $\mu$ l, 0.12 mmol) was added and the mixture was stirred for 2 h at ambient temperature. Aqueous solution of 10% HCl was added and dichloromethane was removed under reduced pressure. The residual solution was extracted with AcOEt twice and the combined extract was then washed with brine. The organic layer was dried over MgSO<sub>4</sub> and the solvent was evaporated. The residue was column-chromatographed on SiO<sub>2</sub> (eluent, Hex:AcOEt = 10:1) to afford the product as colorless oil (26 mg, 78%).

**(*R*)-CFTA ester of (*S*)-1-phenylethanol (CAS: 278181-81-0)**

<sup>1</sup>H NMR (400 MHz, CDCl<sub>3</sub>)  $\delta$  (ppm) 1.61 (3H, d, *J* = 6.6 Hz), 2.38 (3H, brs), 5.96 (1H, q, *J* = 6.6 Hz), 7.13 (2H, m), 7.21 (2H, brd, *J* = 8.8 Hz), 7.22-7.30 (3H), 7.41 (2H, brd, *J* = 7.9 Hz).

**(*R*)-CFTA ester of (*R*)-1-phenylethanol (CAS: 278181-67-2)**

<sup>1</sup>H NMR (400 MHz, CDCl<sub>3</sub>)  $\delta$  (ppm) 1.51 (3H, d, *J* = 6.6 Hz), 2.39 (3H, s), 5.96 (1H, q, *J* = 6.6 Hz), 7.27 (2H, brd, *J* = 8.6 Hz), 7.29-7.39 (5H), 7.49 (2H, brd, *J* = 8.3 Hz).

**(*S*)-CFTA ester of (*S*)-1-phenylpropanol**

Colorless oil,  $[\alpha]_D^{25}$  -45.7 (*c* 0.96, CHCl<sub>3</sub>); <sup>1</sup>H NMR (400 MHz, CDCl<sub>3</sub>)  $\delta$  (ppm) 0.71 (3H, t, *J* = 7.5 Hz), 1.81 (1H, ddq, *J* = 15.4, 7.5, 6.1 Hz), 1.88 (1H, ddq, *J* = 15.4, 7.6, 7.6 Hz), 2.40 (3H, s), 5.73 (1H, dd, *J* = 7.6, 6.1 Hz), 7.24-7.38 (7H, m), 7.52 (2H, brd, *J* = 8.1 Hz); <sup>13</sup>C NMR (100 MHz, CDCl<sub>3</sub>)  $\delta$  9.7, 21.3, 29.2, 81.8, 87.1 (d, *J* = 196.9 Hz), 114.1 (d, *J* = 33.7 Hz), 125.7 (d, *J* = 4.4 Hz), 126.2, 128.36, 128.39, 128.4 (d, *J* = 23.4 Hz), 129.7, 138.2, 141.5 (d, *J* = 2.2 Hz), 162.2 (d, *J* = 30.0 Hz); <sup>19</sup>F NMR (376 MHz, CDCl<sub>3</sub>)  $\delta$  -144.6 ppm; IR ( $\nu$ , neat) 1773, 1248, 1055 cm<sup>-1</sup>; MS (EI), *m/z*: 311 (M<sup>+</sup>), 149 (*p*-tolC(CN)FH<sup>+</sup>), 121 (C<sub>9</sub>H<sub>13</sub><sup>+</sup>), 120 (C<sub>9</sub>H<sub>12</sub><sup>+</sup>); HRMS (ESI) Calcd for C<sub>19</sub>H<sub>18</sub>FNNaO<sub>2</sub> (M + Na): 314.1219, Found: 334.1213.

**(*R*)-CFTA ester of (*S*)-1-phenylpropanol**

Colorless oil,  $[\alpha]_D^{26}$  -13.3 (*c* 1.20, CHCl<sub>3</sub>); <sup>1</sup>H NMR (400 MHz, CDCl<sub>3</sub>)  $\delta$  (ppm) 0.92 (3H, t, *J* = 7.5 Hz), 1.87 (1H, ddq, *J* = 14.5, 7.5, 6.1 Hz), 1.98 (1H, ddq, *J* = 14.5, 7.8, 7.5 Hz), 2.38 (3H, s), 5.74 (1H, dd, *J* = 7.8, 6.1 Hz), 7.27 (2H, brd, *J* = 10 Hz), 7.18-7.27 (3H), 7.24 (2H, d, *J* = 6.1 Hz), 7.51 (2H, brd, *J* = 7.6 Hz); <sup>13</sup>C NMR (100 MHz, CDCl<sub>3</sub>)  $\delta$  9.5, 21.3, 29.2, 81.7, 87.1 (d, *J* = 196.9 Hz), 114.0 (d, *J* = 32.7 Hz), 125.5 (d, *J* = 5.1 Hz), 126.3, 128.5, 128.6, 128.7 (d, *J* = 23.4 Hz), 129.8, 138.4, 141.6 (d, *J* = 2.2 Hz), 162.4 (d, *J* = 30.0 Hz); <sup>19</sup>F NMR (376 MHz, CDCl<sub>3</sub>)  $\delta$  -143.7 ppm; IR ( $\nu$ , neat) 1773, 1250, 1055 cm<sup>-1</sup>; MS (EI), *m/z*: 311 (M<sup>+</sup>), 148 (*p*-tolC(CN)F<sup>+</sup>), 120 (C<sub>9</sub>H<sub>12</sub><sup>+</sup>); HRMS (ESI) Calcd for C<sub>19</sub>H<sub>18</sub>FNNaO<sub>2</sub> (M + Na): 314.1219, Found: 334.1213.

**(*S*)-CFTA ester of (*R*)-4-methylpentan-2-ol**

Colorless oil,  $[\alpha]_D^{27}$  -31.2 (*c* 0.67, CHCl<sub>3</sub>); <sup>1</sup>H NMR (400 MHz, CDCl<sub>3</sub>)  $\delta$  (ppm) 0.73 (3H, d, *J* = 6.1 Hz), 0.76 (3H, d, *J* = 6.6 Hz), 1.21-1.35 (2H), 1.30 (3H, d, *J* = 6.4 Hz), 1.54 (1H, m), 2.40 (3H, s), 5.13 (1H, m), 7.27 (2H, brd, *J* = 8.0 Hz), 7.51 (2H, brd, *J* = 7.6 Hz); <sup>13</sup>C NMR (100 MHz, CDCl<sub>3</sub>)  $\delta$  20.0, 21.3, 21.9, 22.7, 24.4, 44.5, 74.7, 87.2 (d, *J* = 96.5 Hz), 114.2 (d, *J* = 33.5 Hz), 125.5 (d, *J* = 4.7 Hz), 128.8 (d, *J* = 24.0 Hz), 129.7, 141.5 (d, *J* = 1.9 Hz), 162.7 (d, *J* = 29.7 Hz); <sup>19</sup>F NMR (376 MHz, CDCl<sub>3</sub>)  $\delta$  -144.5 ppm; IR ( $\nu$ , neat) 1771, 1258, 1059 cm<sup>-1</sup>; MS (EI), *m/z*: 277 (M<sup>+</sup>), 149

(*p*-tolC(CN)FH<sup>+</sup>), 101 (C<sub>6</sub>H<sub>14</sub>O<sup>+</sup>); HRMS Calcd for C<sub>16</sub>H<sub>20</sub>O<sub>2</sub>FN: 277.1478, Found: 277.1480.

**(R)-CFTA ester of (R)-4-methylpentan-2-ol**

Colorless oil, [ $\alpha$ ]<sub>D</sub><sup>28</sup> -29.4 (c 0.48, CHCl<sub>3</sub>); <sup>1</sup>H NMR (400 MHz, CDCl<sub>3</sub>)  $\delta$  (ppm) 0.87 (3H, d, *J* = 6.4 Hz), 0.90 (3H, d, *J* = 6.4 Hz), 1.16 (3H, d, *J* = 6.4 Hz), 1.34 (1H, m), 1.62 (1H, m), 1.66 (1H, m), 2.40 (3H, s), 5.09 (1H, m), 7.26 (2H, brd, *J* = 8.1 Hz), 7.50 (2H, brd, *J* = 7.6 Hz); <sup>13</sup>C NMR (100 MHz, CDCl<sub>3</sub>)  $\delta$  19.8, 21.2, 22.1, 22.8, 24.6, 44.5, 74.7, 87.1 (d, *J* = 196.5 Hz), 114.2 (d, *J* = 34.5 Hz), 125.5 (d, *J* = 4.8 Hz), 128.8, 129.3 (d, *J* = 97.5 Hz), 141.5 (d, *J* = 3.9 Hz), 162.7 (d, *J* = 29.7 Hz); <sup>19</sup>F NMR (376 MHz, CDCl<sub>3</sub>)  $\delta$  -144.6 ppm; IR ( $\nu$ , neat) 1771, 1258, 1059 cm<sup>-1</sup>; MS (EI), *m/z*: 278 (M+H<sup>+</sup>), 277 (M<sup>+</sup>), 149 (*p*-tolC(CN)FH<sup>+</sup>), 101 (C<sub>6</sub>H<sub>14</sub>O<sup>+</sup>); HRMS Calcd for C<sub>16</sub>H<sub>20</sub>O<sub>2</sub>FN: 277.1478, Found: 277.1480.

**(S)-CFTA ester of (R)-2-octanol (CAS: 278181-80-9)**

<sup>1</sup>H NMR (400 MHz, CDCl<sub>3</sub>)  $\delta$  (ppm) 0.87 (3H, t, *J* = 6.9 Hz), 1.17 (3H, d, *J* = 6.1 Hz), 1.20-1.30 (8H), 1.55 (1H, m), 1.65 (1H, m), 2.39 (3H, s), 5.03 (1H, qdd, *J* = 6.1, 4.4, 3.1 Hz), 7.27 (2H, brd, *J* = 8.8 Hz), 7.51 (2H, brd, *J* = 8.3 Hz).

**(R)-CFTA ester of (R)-2-octanol (CAS: 278181-66-1)**

<sup>1</sup>H NMR (400 MHz, CDCl<sub>3</sub>)  $\delta$  (ppm) 0.84 (3H, t, *J* = 7.3 Hz), 0.89 (1H, m), 1.01 (1H, m), 1.04-1.13 (3H), 1.13 (1H, m), 1.14-1.23 (2H, m), 1.31 (3H, d, *J* = 6.1 Hz), 1.46 (1H, qdd, *J* = 9.1, 6.8, 5.1 Hz), 1.53 (1H, ddq, *J* = 7.6, 7.6, 6.9 Hz), 2.39 (3H, s), 5.02 (1H, dqd, *J* = 7.8, 6.1, 5.1 Hz), 7.27 (2H, brd, *J* = 8.8 Hz), 7.52 (2H, brd, *J* = 8.3 Hz).

**(S)-CFTA ester of (R)-2-methyl-1-phenylpropan-1-ol**

Colorless glassy solid, [ $\alpha$ ]<sub>D</sub><sup>25</sup> -1.4 (c 1.11), <sup>1</sup>H NMR (400 MHz, CDCl<sub>3</sub>)  $\delta$  (ppm) 0.82 (3H, d, *J* = 6.9 Hz), 1.00 (3H, d, *J* = 6.9 Hz), 2.14 (1H, dsept, *J* = 7.6, 6.9 Hz), 2.39 (3H, s), 5.52 (1H, d, *J* = 7.6 Hz), 6.98 (2H, brd, *J* = 7.6 Hz), 7.16-7.23 (5H, m), 7.38 (2H, brd, *J* = 7.8 Hz); <sup>13</sup>C NMR (100 MHz, CDCl<sub>3</sub>)  $\delta$  18.1, 18.5, 21.3, 33.6, 85.4, 86.9 (d, *J* = 96.1 Hz), 114.1 (d, *J* = 33.7 Hz), 125.7 (d, *J* = 5.1 Hz), 126.6, 128.22, 128.26, 129.1 (d, *J* = 23.4 Hz), 129.7, 137.4, 141.5 (d, *J* = 2.2 Hz), 162.0 (d, *J* = 30.7 Hz); <sup>19</sup>F NMR (376 MHz, CDCl<sub>3</sub>)  $\delta$  -143.7 ppm; IR ( $\nu$ , neat) 1775, 1246, 1055 cm<sup>-1</sup>; MS (ESI), *m/z*: 324 (M - 1), 348 (M + Na), 673 (2M + Na); HRMS (ESI) Calcd for C<sub>20</sub>H<sub>20</sub>FNNaO<sub>2</sub> (M + Na): 348.1376, Found: 348.1368.

**(R)-CFTA ester of (R)-2-methyl-1-phenylpropan-1-ol**

Colorless oil, [ $\alpha$ ]<sub>D</sub><sup>24</sup> +47.0 (c 1.19, CHCl<sub>3</sub>), <sup>1</sup>H NMR (400 MHz, CDCl<sub>3</sub>)  $\delta$  (ppm) 0.68 (3H, d, *J* = 6.9 Hz), 0.76 (3H, d, *J* = 6.6 Hz), 2.07 (1H, m), 2.40 (3H, s), 5.51 (1H, d, *J* = 7.6 Hz), 7.26-7.38 (7H), 7.53 (2H, brd, *J* = 7.6 Hz); <sup>13</sup>C NMR (100 MHz, CDCl<sub>3</sub>)  $\delta$  17.9, 18.4, 21.3, 85.3, 87.2 (196.9 Hz), 114.0 (d, *J* = 32.9 Hz), 125.6 (d, *J* = 5.1 Hz), 126.7, 128.43, 128.45, 128.7 (d, *J* = 24.1 Hz), 129.8, 137.7, 141.6 (d, *J* = 2.2 Hz), 162.0 (d, *J* = 30.7 Hz); <sup>19</sup>F NMR (376 MHz, CDCl<sub>3</sub>)  $\delta$  -144.4 ppm; IR ( $\nu$ , neat) 1774, 1248, 1055 cm<sup>-1</sup>; MS (ESI), *m/z*: 324 (M - 1), 348 (M + Na), 673 (2M + Na); HRMS (ESI) Calcd for C<sub>20</sub>H<sub>20</sub>FNNaO<sub>2</sub> (M + Na): 348.1376, Found: 348.1369.

**(S)-CFTA ester of (1S,2S,5R)-menthol (CAS: 278181-87-6)**

<sup>1</sup>H NMR (500 MHz, CDCl<sub>3</sub>)  $\delta$  (ppm) 0.49 (3H, d, *J* = 7.1 Hz), 0.68 (3H, d, *J* = 7.1 Hz), 0.87 (1H, m), 0.93 (3H, d, *J* = 6.6 Hz), 0.97 (1H, d, qd, *J* = 13.1, 3.3 Hz), 1.12 (q, *J* = 11.5 Hz), 1.21 (1H, qdd, *J* = 6.9, 6.9, 3.3 Hz), 1.38 (1H, dddd, *J* = 11.6, 11.6, 2.9, 2.9 Hz), 1.48 (1H, m), 1.63 (1H, m), 1.67 (brd, *J* = 15.6), 2.04 (1H, brd, *J* = 12.0 Hz), 2.40 (3H, s), 4.75 (1H, ddd, *J* = 12.0, 12.0, 4.1 Hz), 7.27 (2H, brd, *J* = 7.0 Hz), 7.51 (2H, brd, *J* = 8.1 Hz).

**(R)-CFTA ester of (1S,2S,5R)-menthol (CAS: 278181-73-0)**

<sup>1</sup>H NMR (400 MHz, CDCl<sub>3</sub>) δ (ppm) 0.75 (3H, d, *J* = 6.8 Hz), 0.82 (1H, m), 0.87 (3H, d, *J* = 6.6 Hz), 0.89 (3H, d, *J* = 7.1 Hz), 0.92 (1H, m), 1.04 (1H, ddd, *J* = 13.9, 11.6, 3.9 Hz), 1.45 (1H, m), 1.47 (1H, dddd, *J* = 11.3, 11.3, 3.2, 3.2 Hz), 1.67 (1H, m), 1.69 (1H, dq, *J* = 13.9, 3.6 Hz), 1.84 (1H, m), 1.87 (1H, dddd, *J* = 8.1, 7.1, 7.1, 2.9 Hz), 2.40 (3H, brs), 4.82 (1H, td, *J* = 11.0, 4.4 Hz), 7.28 (2H, brd, *J* = 7.7 Hz), 7.50 (2H, brd, *J* = 7.7 Hz).

**(S)-CFTA ester of (1S,2R,5R)-isomenthol (CAS: 278181-86-5)**

<sup>1</sup>H NMR (500 MHz, CDCl<sub>3</sub>) δ (ppm) 0.84 (3H, d, *J* = 6.8 Hz), 0.86 (3H, d, *J* = 6.8 Hz), 0.94 (3H, d, *J* = 6.7 Hz), 1.17 (1H, dddd, *J* = 12.8, 7.7, 6.8, 3.6 Hz), 1.38 (1H, ddd, *J* = 13.7, 8.6, 3.2 Hz), 1.42-1.53 (3H), 1.53 (1H, m), 1.64 (1H, m), 1.72 (1H, dsept, *J* = 7.1, 7.1 Hz), 2.40 (3H, s), 4.82 (1H, ddd, *J* = 6.2, 6.2, 3.4 Hz), 7.27 (2H, brd, *J* = 8.9 Hz), 7.52 (2H, brd, *J* = 8.3 Hz).

**(R)-CFTA ester of (1S,2R,5R)-isomenthol (CAS: 278181-72-9)**

<sup>1</sup>H NMR (400 MHz, CDCl<sub>3</sub>) δ (ppm) 0.73 (3H, d, *J* = 6.6 Hz), 0.83 (3H, d, *J* = 6.6 Hz), 0.92 (3H, d, *J* = 7.1 Hz), 1.18 (1H, m), 1.25 (1H, m), 1.42 (1H, m), 1.41 (2H, m), 1.46 (1H, dd, *J* = 14.1, 7.1), 1.52 (1H, ddd, *J* = 13.2, 8.5, 3.5 Hz), 1.71 (1H, ddd, *J* = 13.3, 6.6, 4.7 Hz), 1.88 (1H, m), 2.40 (3H, s), 5.14 (1H, ddd, *J* = 6.6, 6.6, 3.5 Hz), 7.28 (2H, brd, *J* = 8.6 Hz), 7.52 (2H, brd, *J* = 7.8 Hz).

**(S)-CFTA ester of (1S,2S,5R)-neomenthol (CAS: 278181-85-4)**

<sup>1</sup>H NMR (400 MHz, CDCl<sub>3</sub>) δ (ppm) 0.67 (3H, d, *J* = 6.1 Hz), 0.86 (3H, d, *J* = 6.8 Hz), 0.89 (3H, d, *J* = 6.6 Hz), 0.93-1.05 (3H), 1.24 (1H, dd, *J* = 13.2, 3.7 Hz), 1.26 (1H, td, *J* = 13.2, 3.7 Hz), 1.46 (1H, ddq, *J* = 10.0, 10.0, 6.6 Hz), 1.64 (1H, brd, *J* = 6.2 Hz), 1.68-1.80 (2H), 2.40 (3H, s), 5.32 (1H, brs), 7.27 (2H, brd, *J* = 8.1 Hz), 7.50 (2H, brd, *J* = 8.1 Hz).

**(R)-CFTA ester of (1S,2S,5R)-neomenthol (CAS: 278181-71-8)**

<sup>1</sup>H NMR (400 MHz, CDCl<sub>3</sub>) δ (ppm) 0.53 (3H, d, *J* = 6.6 Hz), 0.71 (3H, d, *J* = 6.8 Hz), 0.83 (1H, m), 0.87 (3H, d, *J* = 6.4 Hz), 0.92 (1H, brd, *J* = 10.4 Hz), 0.93 (1H, m), 1.10 (1H, ddd, *J* = 14.4, 12.5, 2.2 Hz), 1.24 (1H, dddd, *J* = 13.3, 12.5, 12.5, 3.4 Hz), 1.65 (1H, m), 1.69 (1H, m), 1.76 (1H, m), 2.05 (1H, dddd, *J* = 14.6, 5.8, 5.8, 2.4 Hz), 2.40 (3H, brs), 5.25 (1H, brd, *J* = 1.8 Hz), 7.27 (2H, brd, *J* = 7.9 Hz), 7.51 (2H, brd, *J* = 7.6 Hz).

**(S)-CFTA ester of (1R,2R)-exo-borneol**

Colorless oil,  $[\alpha]_D^{27}$  -55.6 (c 1.30, CHCl<sub>3</sub>), <sup>1</sup>H NMR (400 MHz, CDCl<sub>3</sub>) δ (ppm), 0.52 (3H, s), 0.79 (3H, s), 0.91 (3H, s), 1.07 (1H, ddd, *J* = Hz), 1.08 (1H, ddd, *J* = Hz), 1.52 (1H, dd, *J* = Hz), 1.68 (1H, m), 1.77 (1H, dd, *J* = Hz), 1.83 (1H, dd, *J* = Hz), 1.87 (1H, dq, *J* = Hz), 2.40 (3H, s), 4.77 (1H, dd, *J* = Hz), 7.28 (1H, brd, *J* = Hz), 7.50 (2H, brd, *J* = Hz), <sup>13</sup>C NMR (376 MHz, CDCl<sub>3</sub>) δ 10.8, 19.6, 19.9, 21.3, 26.8, 33.3, 38.1, 44.9, 47.0, 49.2, 84.2, 87.2 (d, *J* = 196.5 Hz), 114.1 (d, *J* = 32.6 Hz), 125.4 (d, *J* = 4.8 Hz), 128.8 (d, *J* = 23.9 Hz), 129.7, 141.5, (d, *J* = 2.9 Hz), 162.6 (d, *J* = 30.7 Hz); <sup>19</sup>F NMR (376 MHz, CDCl<sub>3</sub>) δ -146.0 ppm, IR (ν, neat) 177.1, 1250, 1059 cm<sup>-1</sup>; MS (EI), *m/z*: 329 (m<sup>+</sup>), 314 (M - Me<sup>+</sup>), 148 (*p*-tolC(CN)F<sup>+</sup>), 138 (M - CFTA-O<sup>+</sup>); HRMS Calcd for C<sub>20</sub>H<sub>24</sub>O<sub>2</sub>FN: 329.1791, Found: 329.1796.

**(R)-CFTA ester of (1R,2R)-exo-borneol**

Colorless oil,  $[\alpha]_D^{27}$  -37.9 (c 1.55, CHCl<sub>3</sub>), <sup>1</sup>H NMR (400 MHz, CDCl<sub>3</sub>) δ (ppm) 0.81 (3H, s), 0.82 (3H, s), 0.89 (3H, s),

1.04 (1H, m), 1.13 (1H, dd,  $J = 14.0, 3.4$  Hz), 1.54 (1H, ddd,  $J =$  Hz), 1.58 (1H, ddd,  $J =$  Hz), 1.66 (1H, m), 1.71 (1H, m), 1.73 (1H, m), 2.39 (3H, s), 4.78 (1H, dd,  $J =$  Hz), 7.26 (1H, brd,  $J =$  Hz), 7.48 (2H, brd,  $J =$  Hz),  $^{13}\text{C}$  NMR (376 MHz,  $\text{CDCl}_3$ )  $\delta$  11.2, 19.5, 19.9, 21.3, 26.8, 33.3, 38.0, 44.8, 47.0, 49.3, 85.3, 87.1, (d,  $J = 196.4$  Hz), 114.1 (d,  $J = 33.5$  Hz), 125.4 (d,  $J = 3.7$  Hz), 128.6 (d,  $J = 24.0$  Hz), 129.8, 141.5, 162.6 (d,  $J = 20.7$  Hz);  $^{19}\text{F}$  NMR (376 MHz,  $\text{CDCl}_3$ )  $\delta$  -145.5 ppm, IR ( $\nu$ , neat) 1771, 1250, 1059  $\text{cm}^{-1}$ ; MS (EI),  $m/z$ : 329 ( $\text{M}^+$ ), 314 ( $\text{M} - \text{Me}^+$ ), 149 ( $p\text{-tolC}(\text{CN})\text{FH}^+$ ), 138 ( $\text{M} - \text{CFTA-O}^+$ ); HRMS Calcd for  $\text{C}_{20}\text{H}_{24}\text{O}_2\text{FN}$ : 329.1791, Found: 329.1794.

**(S)-CFTA ester of (1S,2R)-endo-borneol (CAS: 278181-84-3)**

$^1\text{H}$  NMR (400 MHz,  $\text{CDCl}_3$ )  $\delta$  (ppm) 0.66 (3H, s), 0.85 (3H, s), 0.86 (1H, m), 0.87 (3H, s), 1.09 (1H, dd,  $J = 14.0, 3.4$  Hz), 1.24 (1H, m), 1.26 (1H, m), 1.72 (1H, m), 1.77 (1H, m), 2.38 (1H, m), 2.40 (3H, s), 4.98 (1H, ddd,  $J = 10.0, 3.4, 2.0$  Hz), 7.28 (1H, brd,  $J = 8.6$  Hz), 7.54 (2H, brd,  $J = 7.8$  Hz).

**(R)-CFTA ester of (1S,2R)-endo-borneol (CAS: 278181-70-7)**

$^1\text{H}$  NMR (400 MHz,  $\text{CDCl}_3$ )  $\delta$  (ppm), 0.77 (1H, dd,  $J = 13.9, 3.2$  Hz), 0.87 (6H, brs), 0.88 (3H, s), 1.05 (1H, ddd,  $J = 12.5, 9.5, 4.4$  Hz), 1.34 (1H, m), 1.66 (1H, dd,  $J = 5.0, 4.4$  Hz), 1.72 (1H, dddd,  $J = 12.2, 12.2, 3.9, 3.9, 3.9$  Hz), 1.86 (1H, ddd,  $J = 13.4, 9.5, 4.4$  Hz), 2.29 (1H, dddd,  $J = 9.9, 9.9, 4.3, 3.9$  Hz), 2.40 (3H, s), 5.03 (1H, ddd,  $J = 9.8, 2.5, 2.5$  Hz), 7.29 (2H, brd,  $J = 8.1$  Hz), 7.52 (2H, brd,  $J = 8.3$  Hz).

**(S)-CFTA ester of  $3\beta$ -chorestanol**

Colorless micro-crystals; mp = 95-97 °C (EtOH);  $[\alpha]_{\text{D}}^{24} +1.7$  (c 1.25,  $\text{CHCl}_3$ );  $^1\text{H}$  NMR (600 MHz,  $\text{CDCl}_3$ )  $\delta$  (ppm) 0.62 (1H, ddd,  $J = 12.9, 11.0, 4.0$  Hz), 0.64 (3H, s), 0.81 (3H, s), 0.85 (1H, m), 0.856 (3H, d,  $J = 6.9$  Hz), 0.863 (3H, d,  $J = 6.9$  Hz), 0.89 (3H, d,  $J = 6.5$  Hz), 0.94-1.03 (5H), 1.04-1.20 (6H), 1.21-1.38 (7H), 1.44 (1H, m), 1.45-1.57 (4H), 1.65 (1H), 1.66 (1H), 1.70 (1H), 1.71 (1H), 1.80 (1H, m), 1.95 (1H, ddd,  $J = 12.8, 4.0, 3.0$  Hz), 2.40 (3H, s), 4.84 (1H, dddd,  $J = 11.6, 11.6, 4.7, 4.7$  Hz), 7.27 (2H, brd,  $J = 8.6$  Hz), 7.50 (2H, brd,  $J = 8.0$  Hz);  $^{13}\text{C}$  NMR (150 MHz,  $\text{CDCl}_3$ )  $\delta$  (ppm) 12.6, 12.2, 18.7, 21.2, 21.3, 22.6, 22.8, 23.8, 24.2, 26.9, 28.1, 28.2, 28.5, 31.9, 33.4, 35.39, 35.42, 35.8, 36.2, 36.5, 39.5, 39.9, 42.6, 44.6, 54.1, 56.3, 56.4, 78.5, 87.3 (d,  $J = 196.5$  Hz), 114.2 (d,  $J = 33.0$  Hz), 125.5 (d,  $J = 4.3$  Hz), 128.8 (d,  $J = 23.6$  Hz), 129.8, 141.5, 162.6 (d,  $J = 30.1$  Hz);  $^{19}\text{F}$  NMR (376 MHz,  $\text{CDCl}_3$ )  $\delta$  -144.2 ppm; HRMS (EI) Calcd for  $\text{C}_{37}\text{H}_{54}\text{O}_2\text{FN}$ : 563.4139, Found: 563.4138.

**(R)-CFTA ester of  $3\beta$ -chorestanol**

Colorless micro-crystals; mp = 113-114 °C (EtOH);  $[\alpha]_{\text{D}}^{24} +20.4$  (c 1.34,  $\text{CHCl}_3$ );  $^1\text{H}$  NMR (600 MHz,  $\text{CDCl}_3$ )  $\delta$  (ppm) 0.63 (1H, ddd,  $J = 12.9, 11.6, 4.2$  Hz), 0.64 (3H, s), 0.857 (3H, d,  $J = 6.8$  Hz), 0.861 (3H, d,  $J = 6.8$  Hz), 0.89 (3H, d,  $J = 6.7$  Hz), 0.97 (1H, m), 0.99 (2H), 1.05-1.15 (6H), 1.45 (1H), 1.51 (1H), 1.53 (2H), 1.60 (1H, brd,  $J = 12.9$ ), 1.64 (1H, dddd,  $J = 11.1, 11.1, 3.6, 3.6$  Hz), 1.76 (1H, ddd,  $J = 13.4, 3.7, 3.7$  Hz), 1.80 (1H, m), 1.88 (1H, brd,  $J = 12.9$ ), 1.96 (1H, ddd,  $J = 12.7, 3.3, 3.3$  Hz), 2.40 (3H, s), 4.84 (1H, dddd,  $J = 11.4, 11.4, 4.8, 4.8$  Hz), 7.27 (2H, brd,  $J = 7.8$  Hz), 7.50 (2H, brd,  $J = 8.0$  Hz),  $^{13}\text{C}$  NMR (150 MHz,  $\text{CDCl}_3$ )  $\delta$  (ppm) 12.0, 12.2, 18.6, 21.2, 21.3, 22.5, 22.8, 23.8, 24.2, 27.0, 28.0, 28.2, 28.5, 31.9, 33.3, 35.37, 35.39, 35.8, 36.2, 36.5, 39.5, 39.9, 42.6, 44.6, 54.1, 56.2, 56.3, 78.5, 87.1 (d,  $J = 195.0$  Hz), 114.2 (d,  $J = 33.0$  Hz), 125.5 (d,  $J = 4.3$  Hz), 128.8 (d,  $J = 22.9$  Hz), 129.8, 141.5, 162.6 (d,  $J = 30.1$  Hz);  $^{19}\text{F}$  NMR (376 MHz,  $\text{CDCl}_3$ )  $\delta$  -144.2 ppm; HRMS (EI) Calcd for  $\text{C}_{37}\text{H}_{54}\text{O}_2\text{FN}$ : 563.4139, Found: 563.4153.

**S-2.  $^1\text{H}$  and  $^{13}\text{C}$  NMR Spectra of New Compounds**

*(S)*-CFTA ester of *(S)*-1-phenylpropan-1-ol

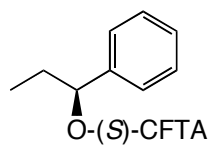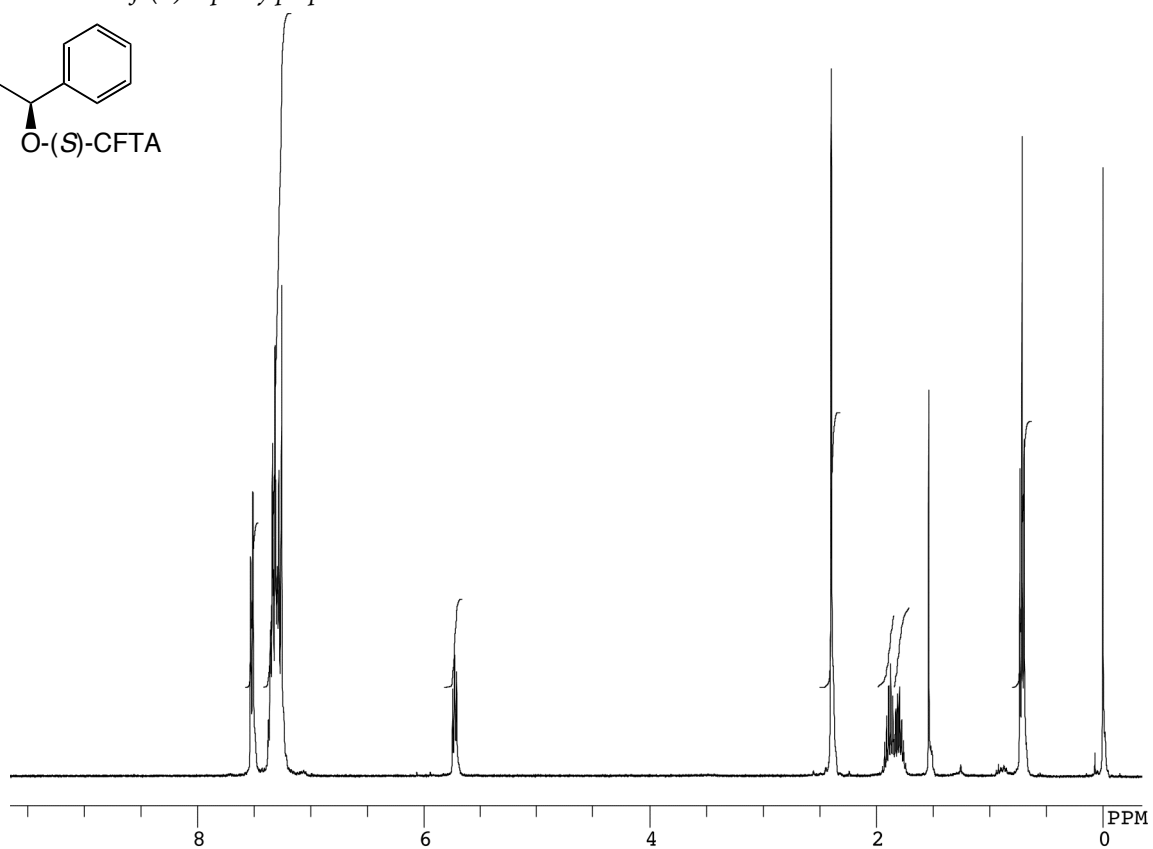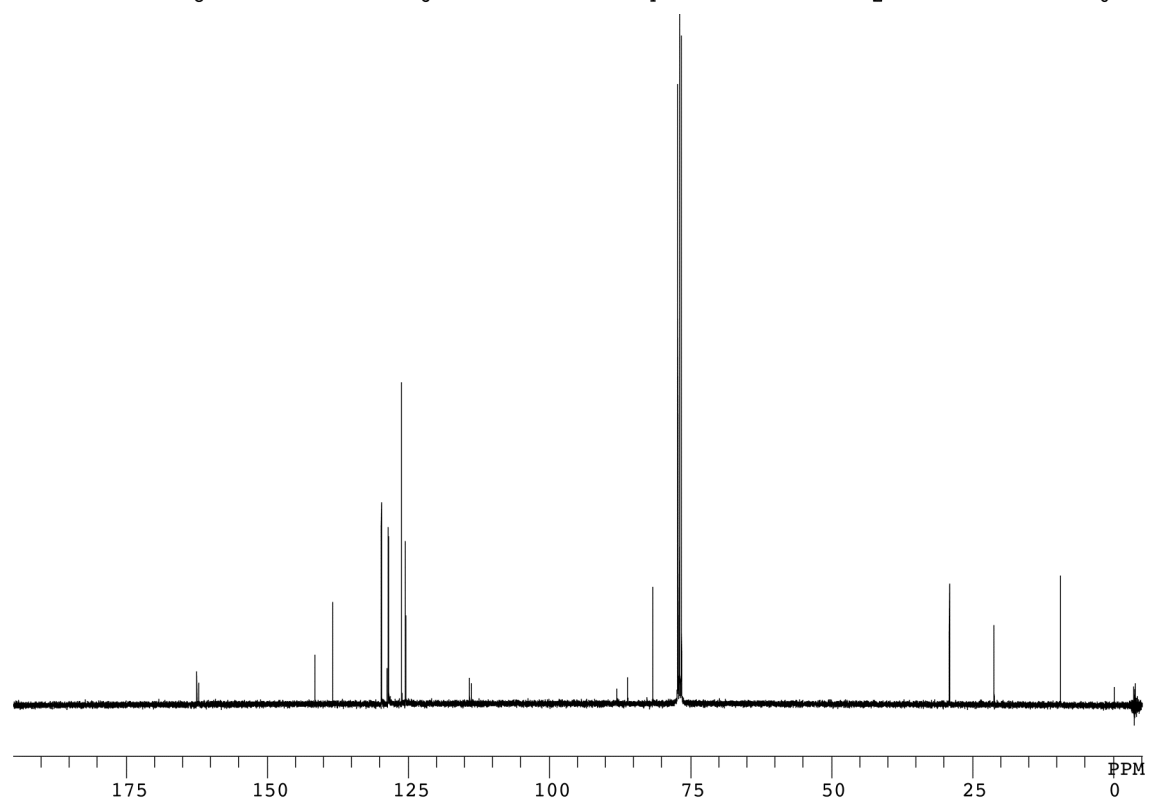

(*R*)-CFTA ester of (*S*)-1-phenylpropan-1-ol

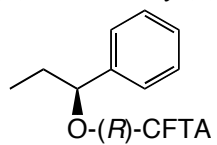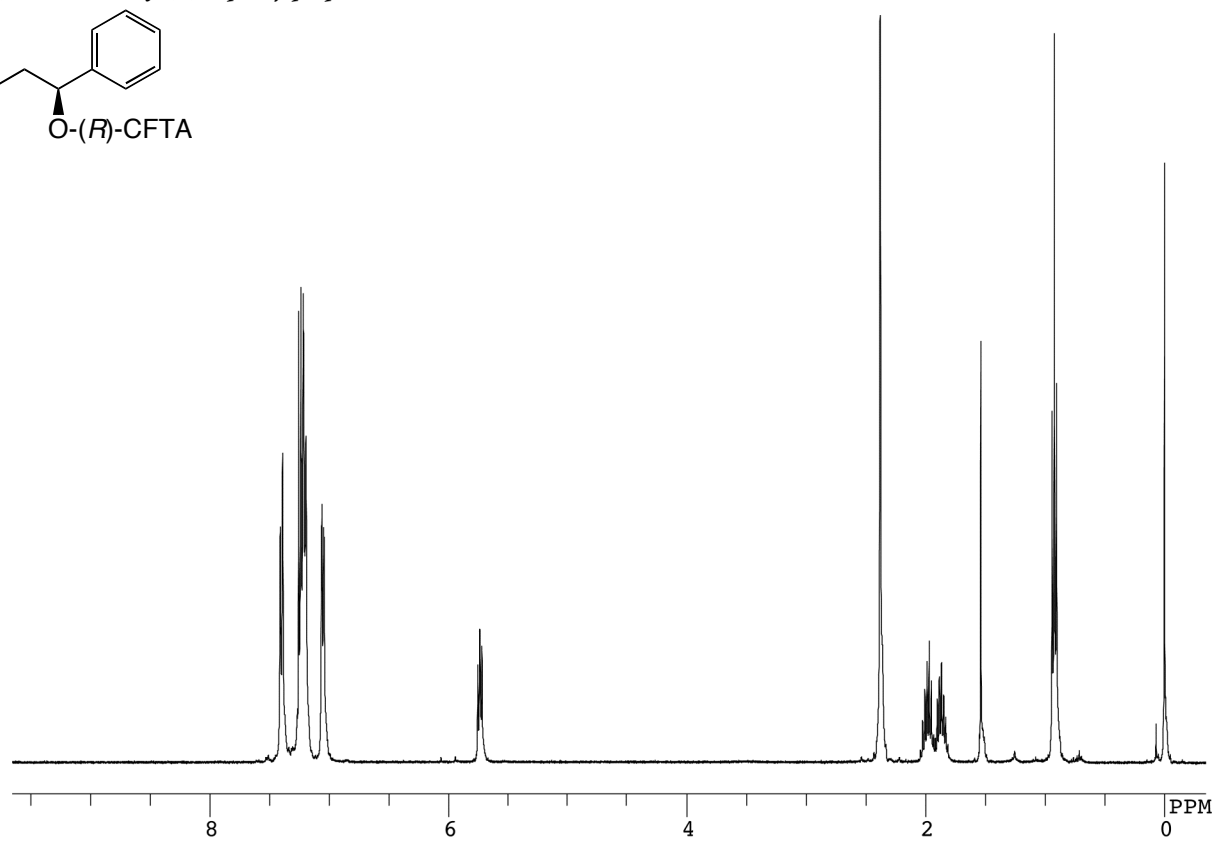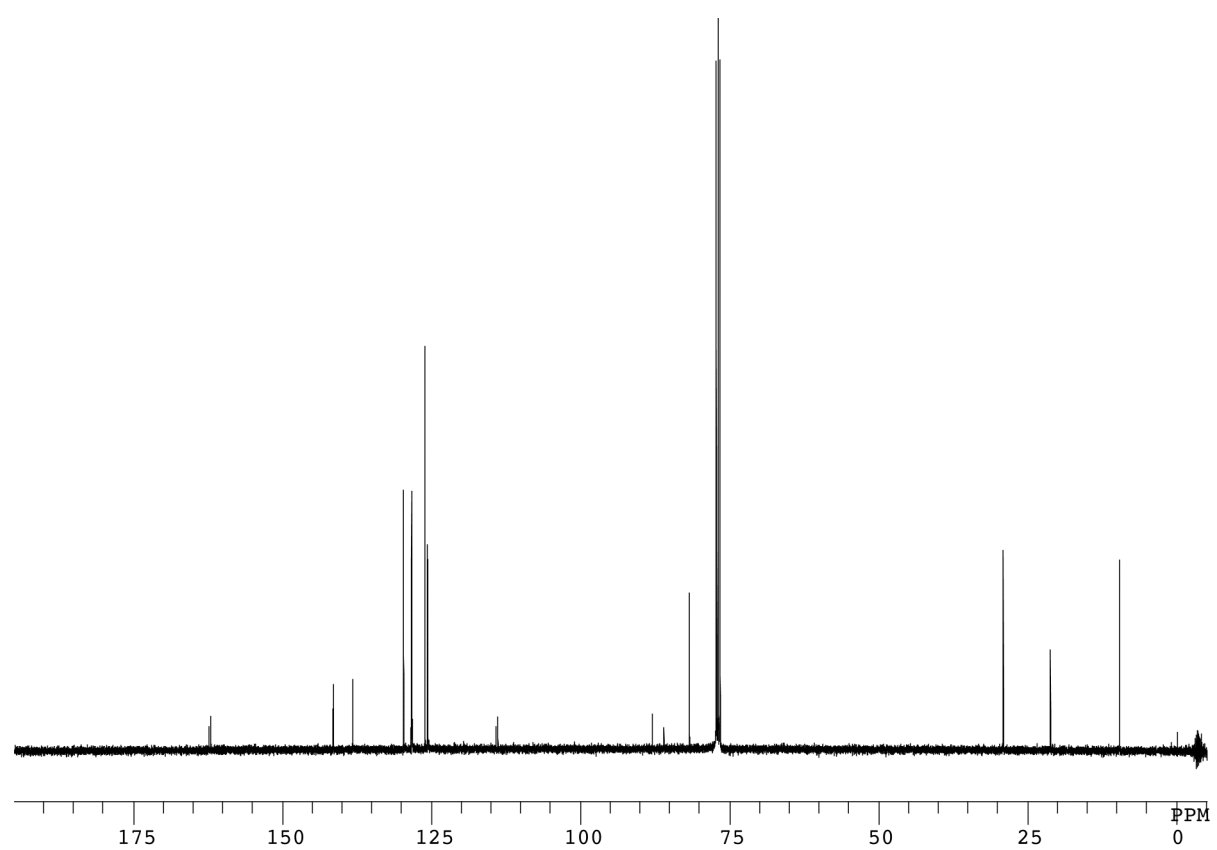

(S)-CFTA ester of (R)-4-methylpentan-2-ol

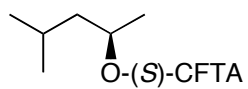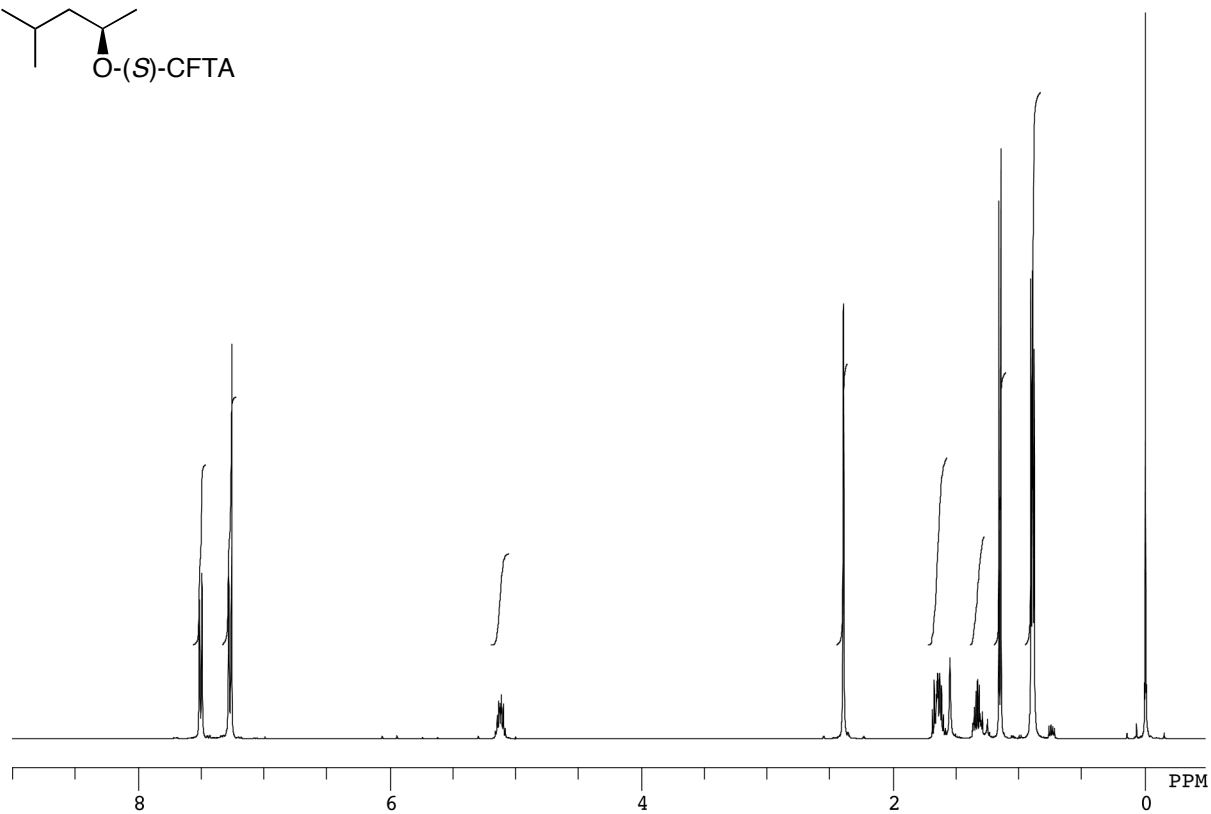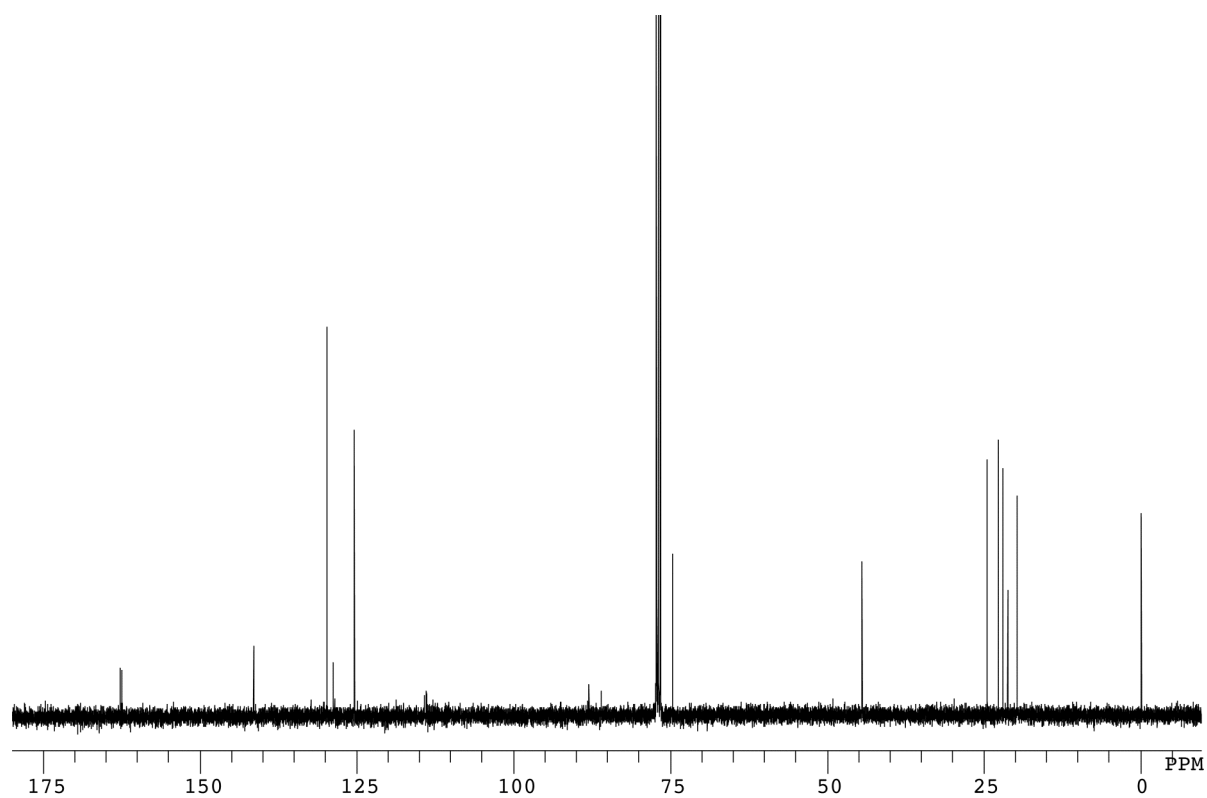



(*R*)-CFTA ester of (*R*)-4-methylpentan-2-ol

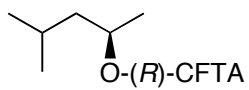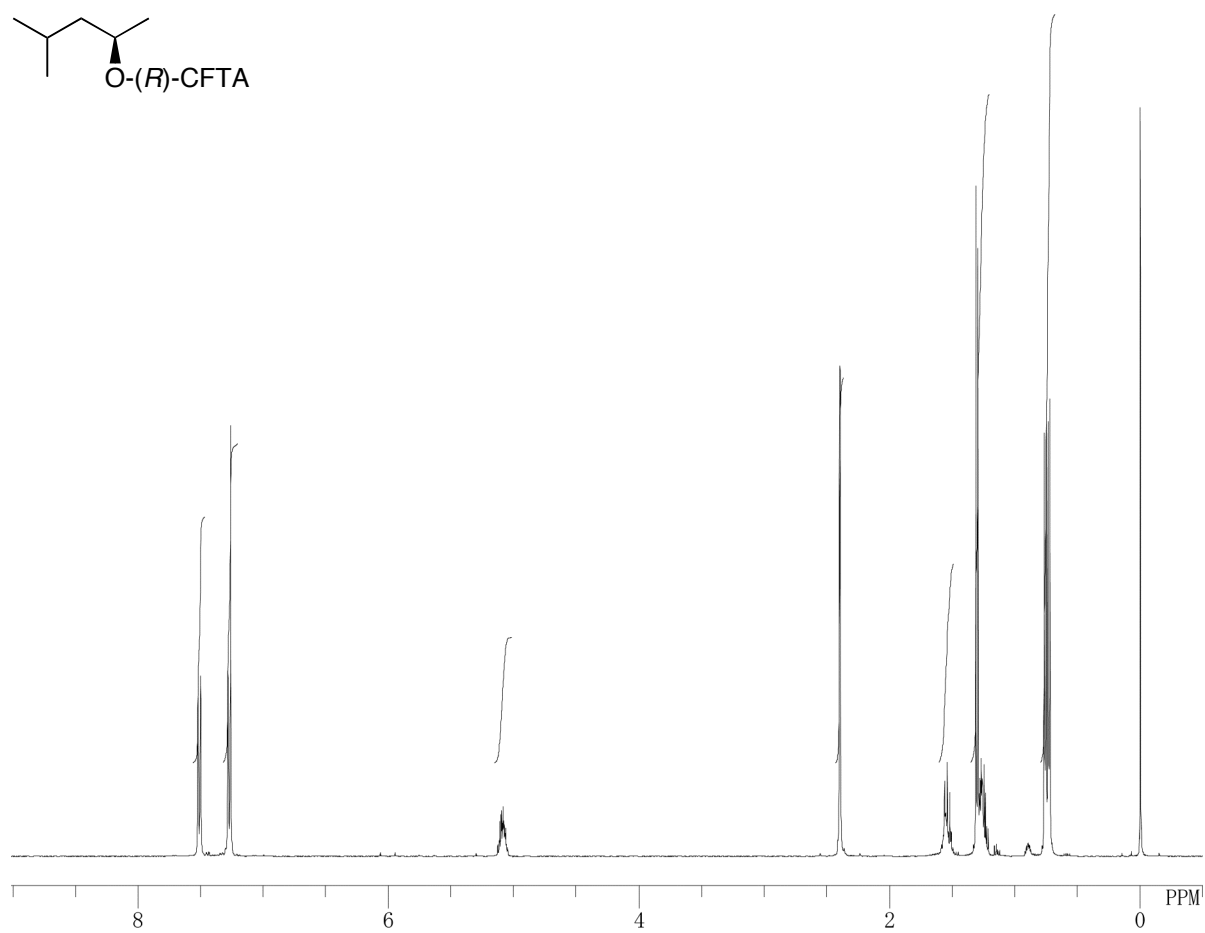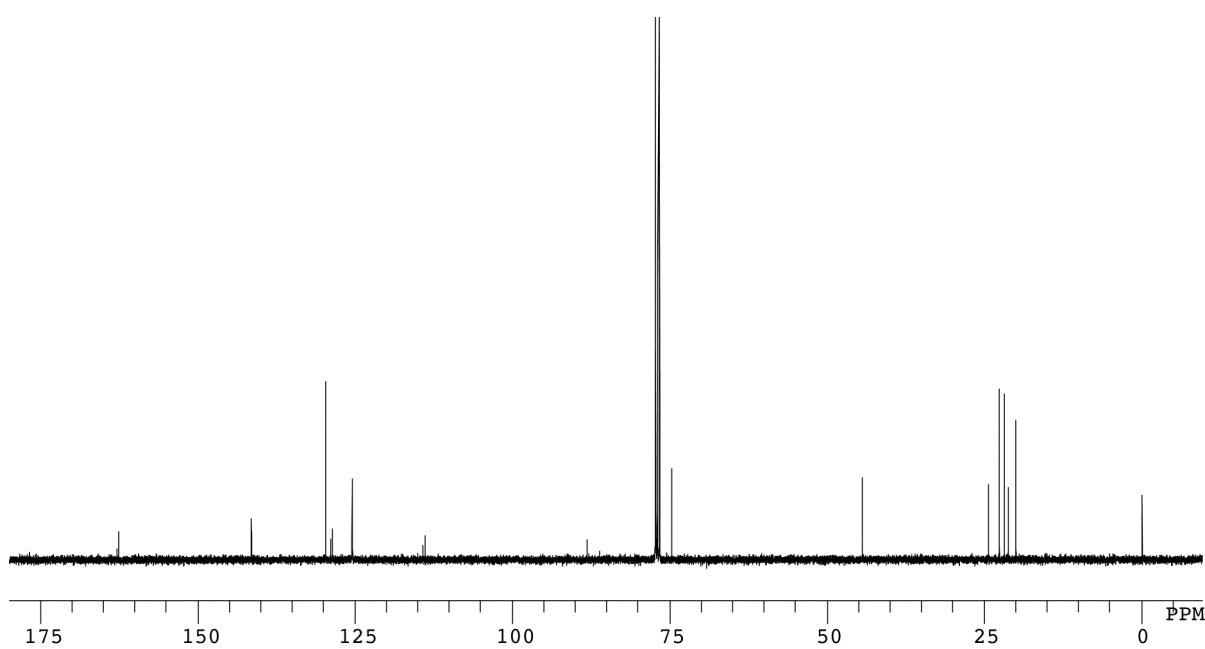

*(S)*-CFTA ester of *(R)*-2-methyl-1-phenylpropanol

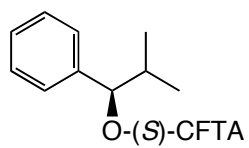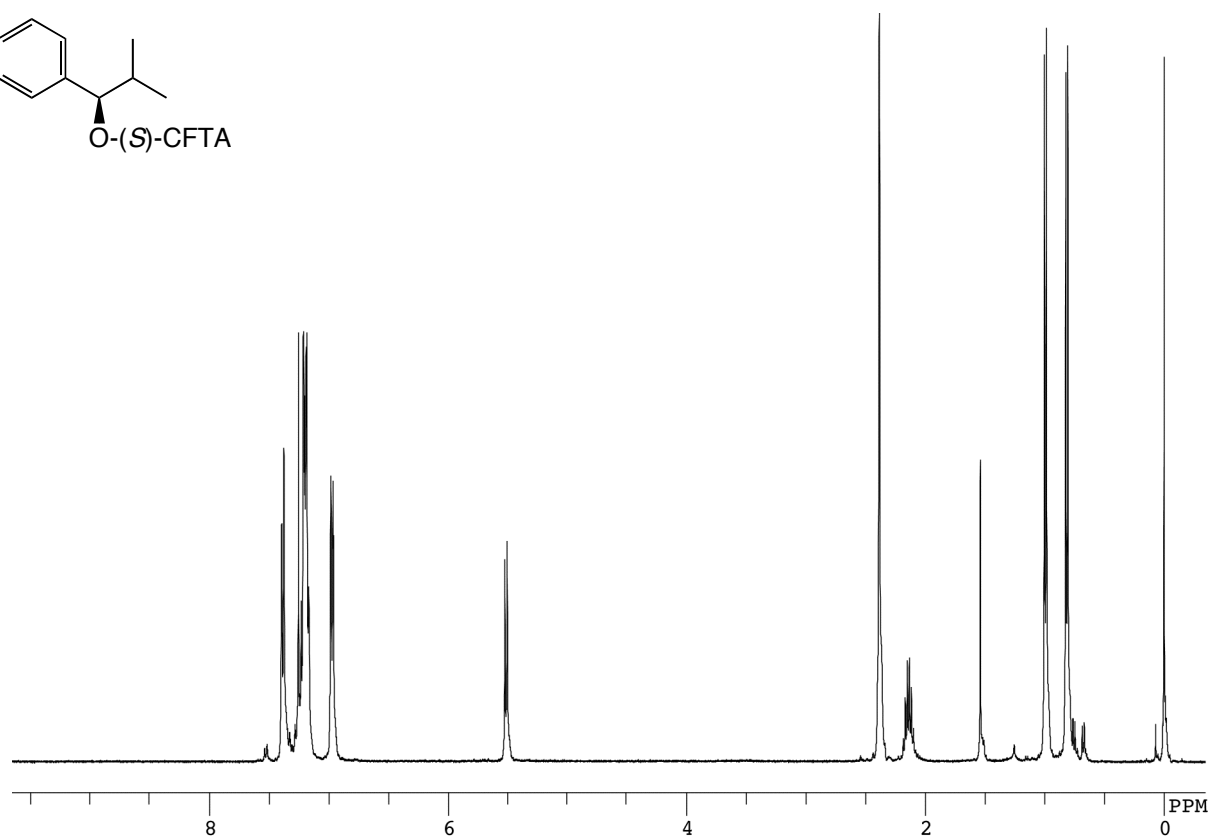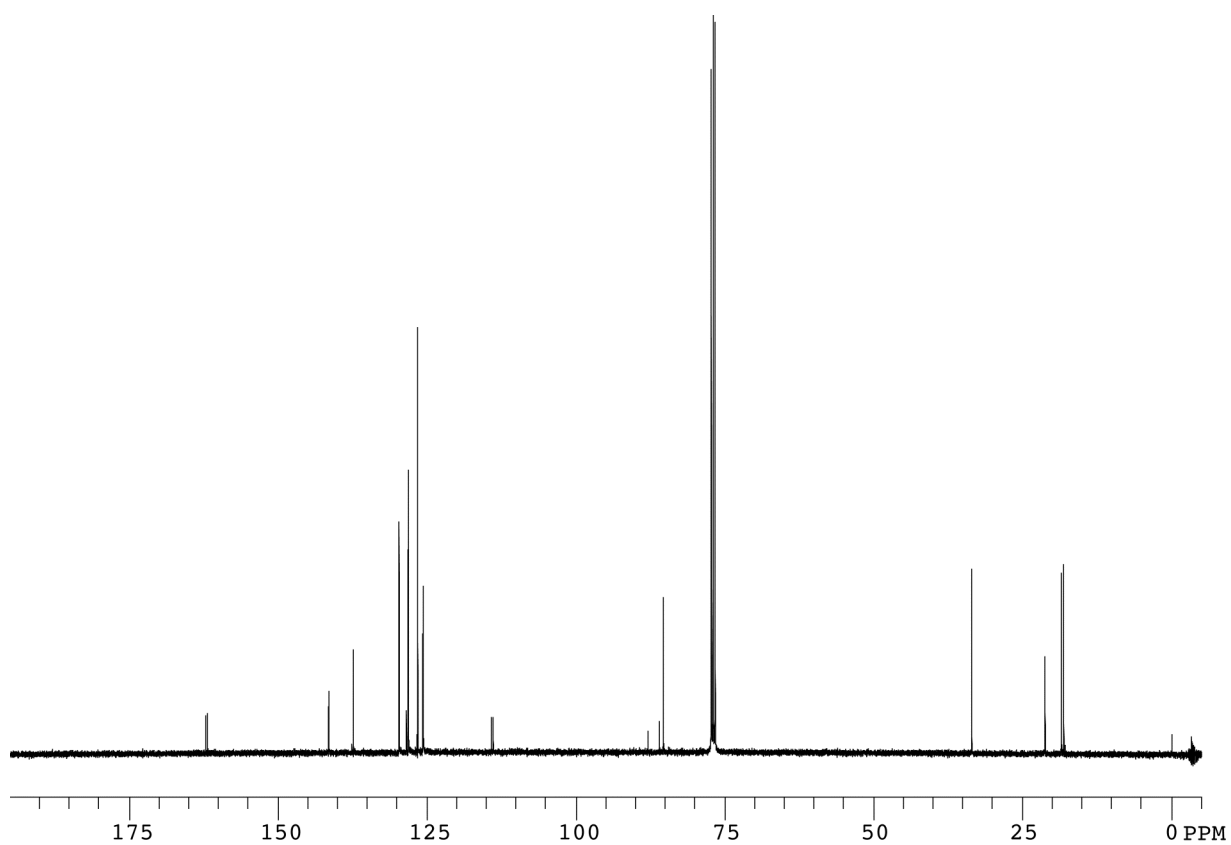

*(R)*-CFTA ester of *(R)*-2-methyl-1-phenylpropanol

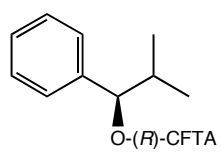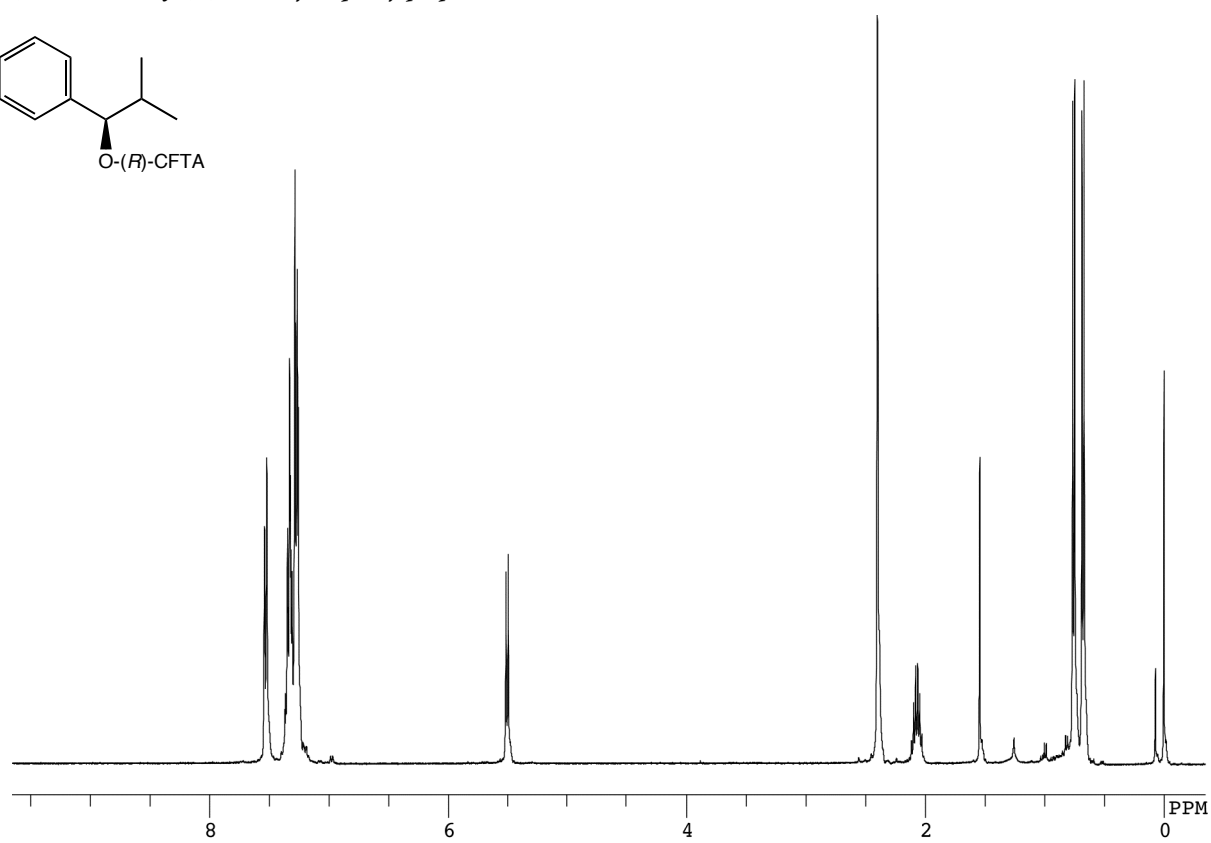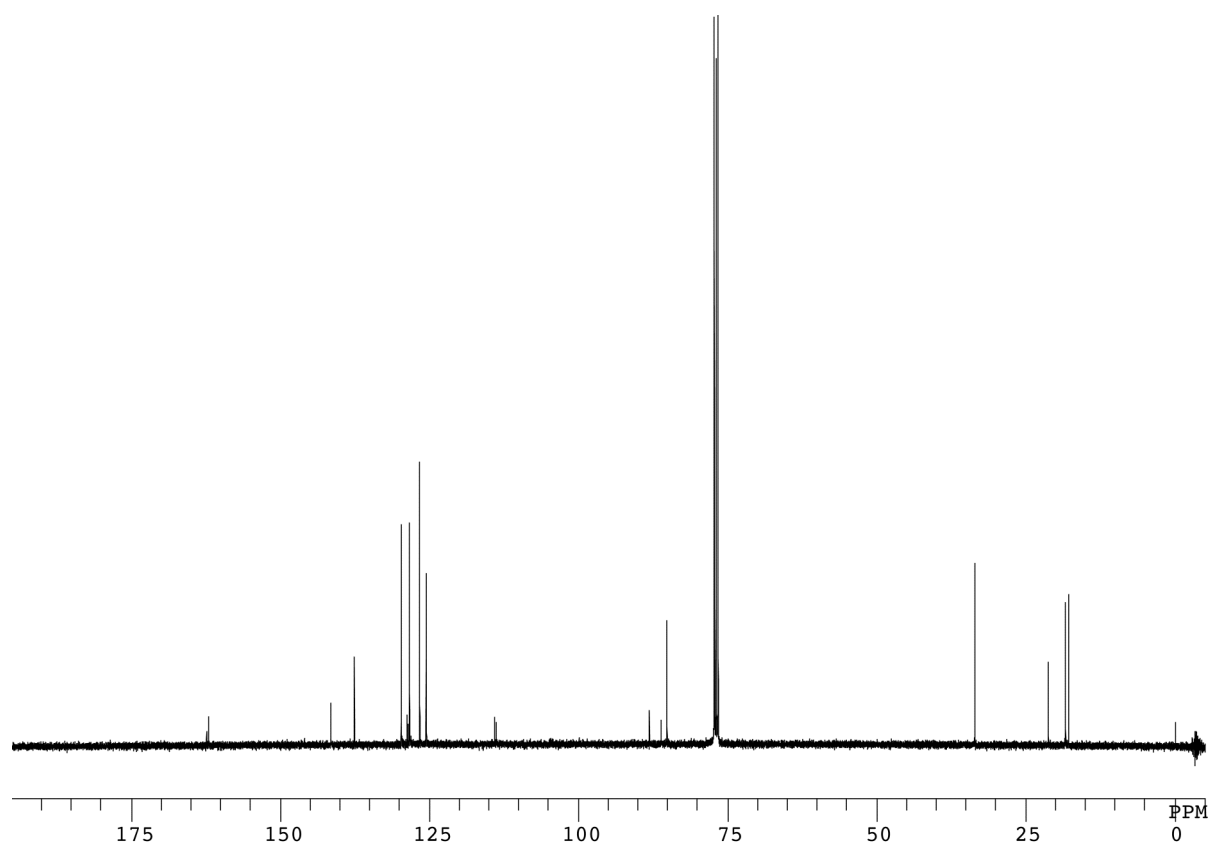

(S)-CFTA ester of (1R,2R)-exo-borneol

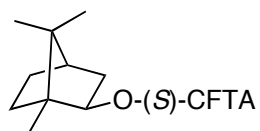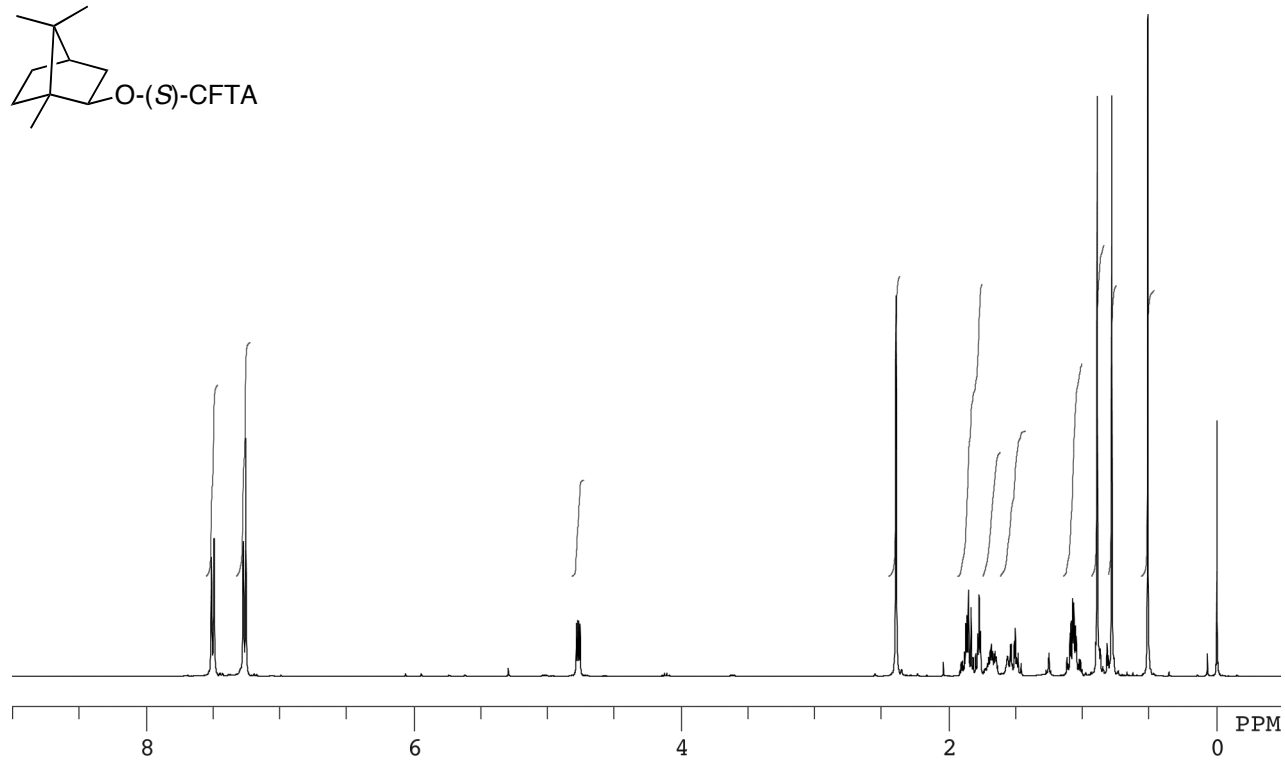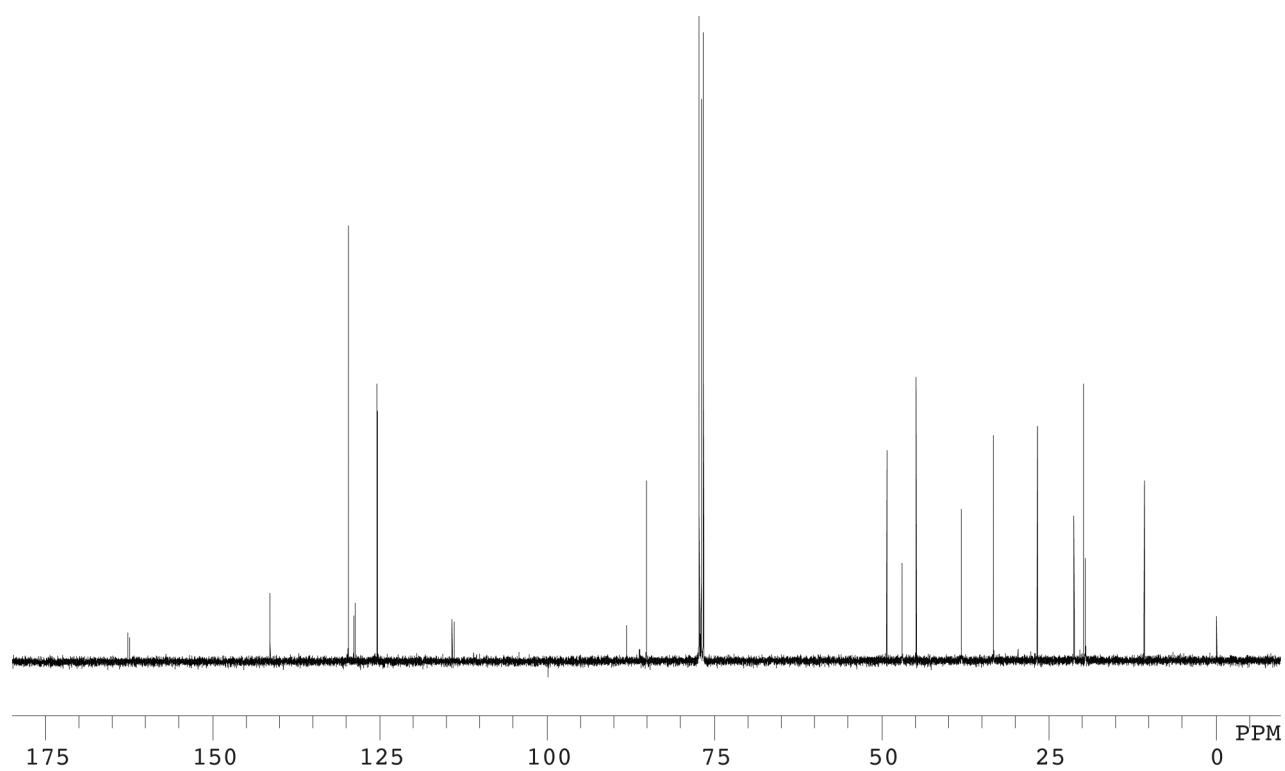

*(R)*-CFTA ester of *(1R,2R)*-*exo*-borneol

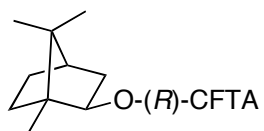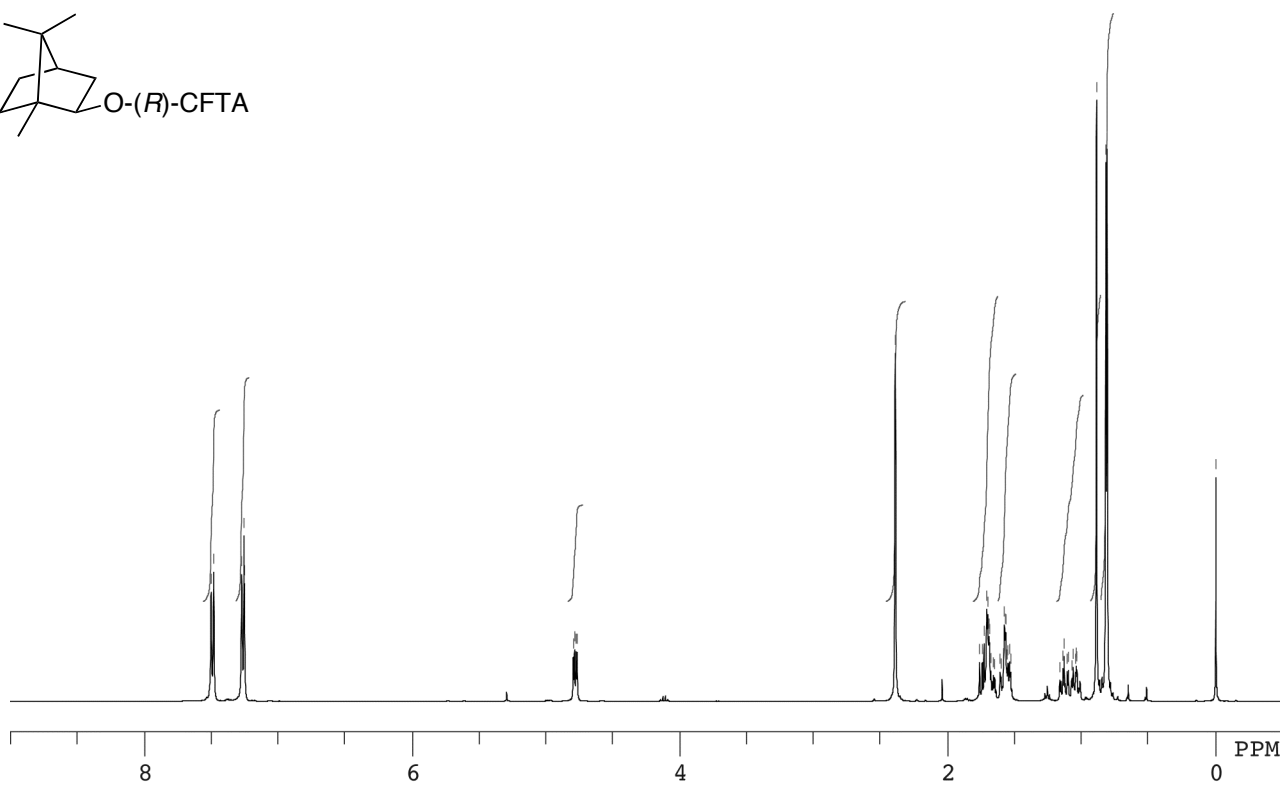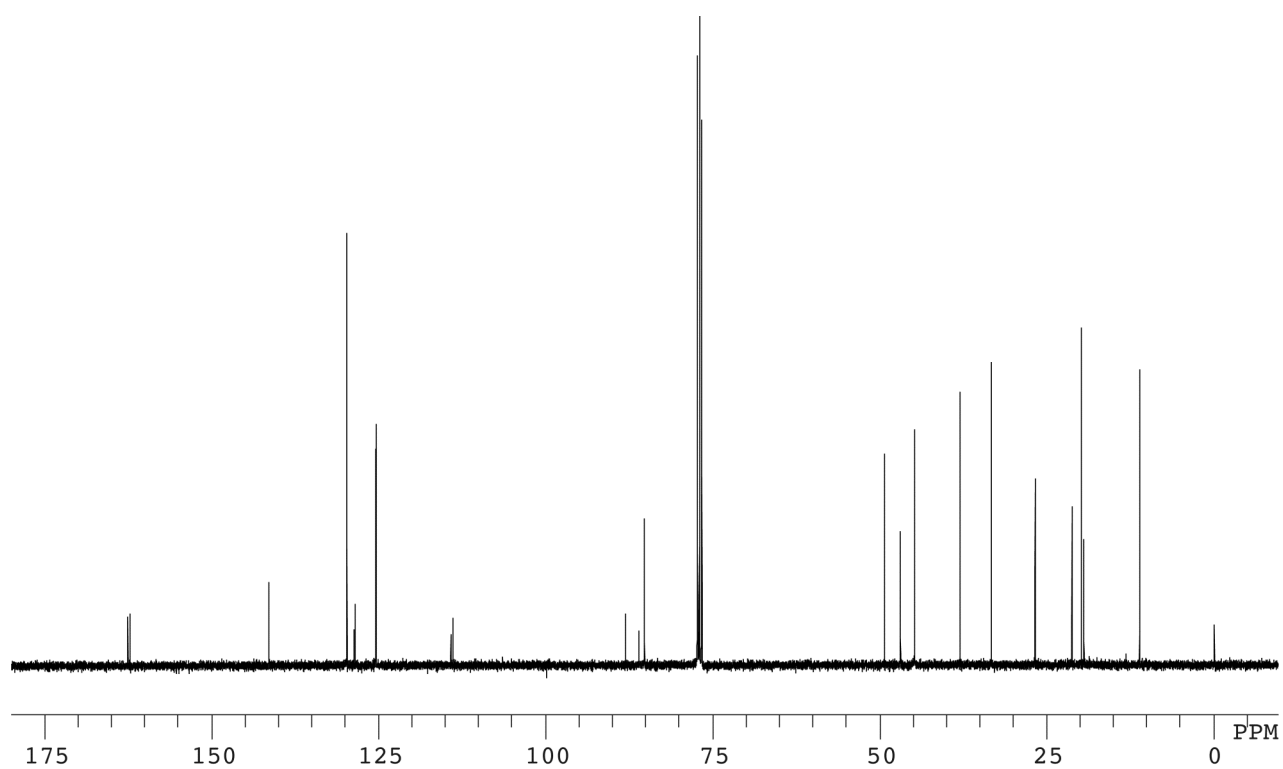

(S)-CFTA ester of 3 $\beta$ -cholestanol

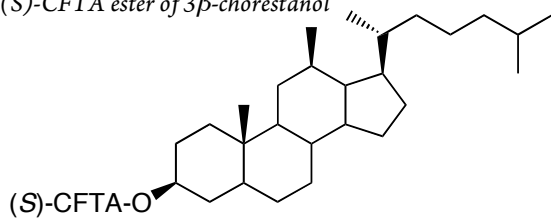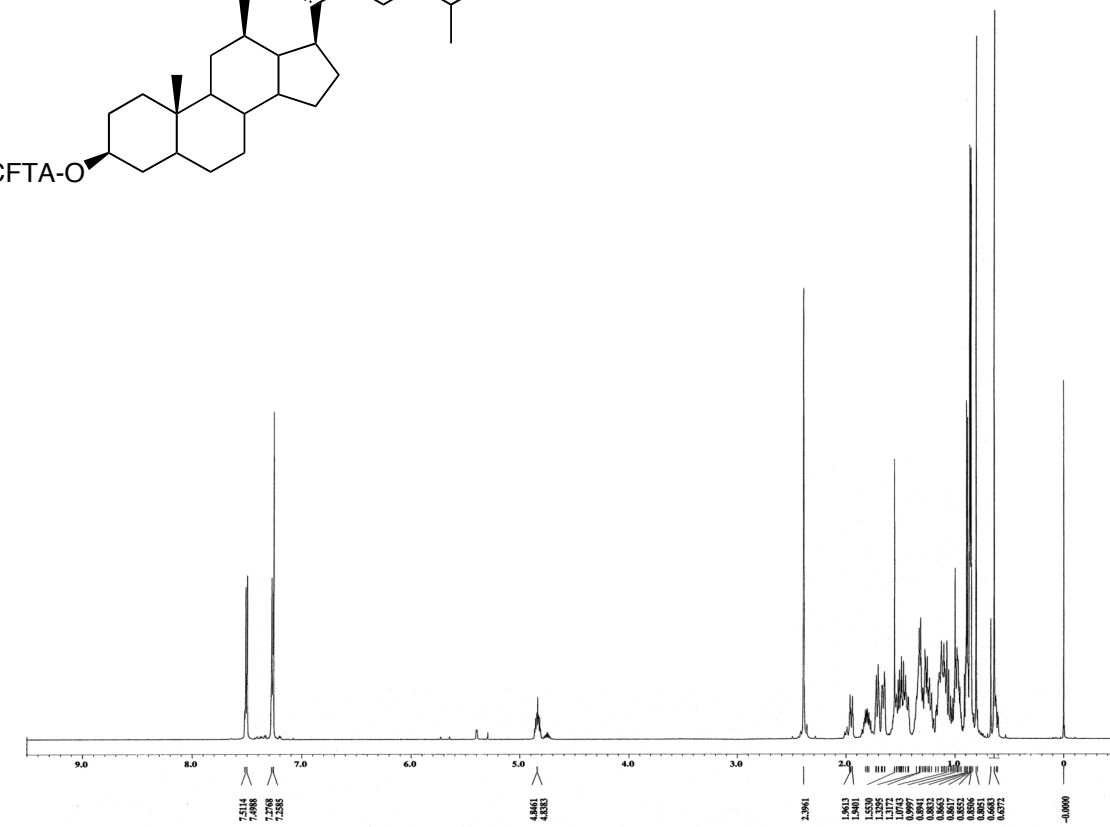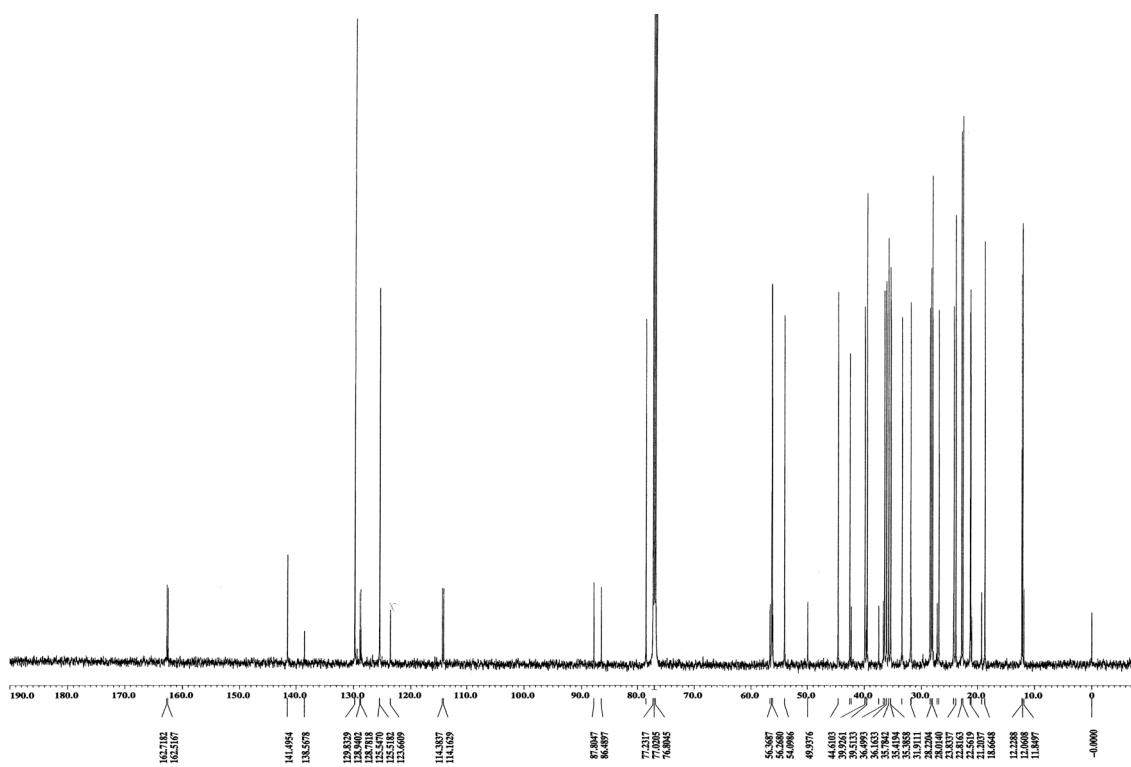

(R)-CFTA ester of 3 $\beta$ -cholestanol

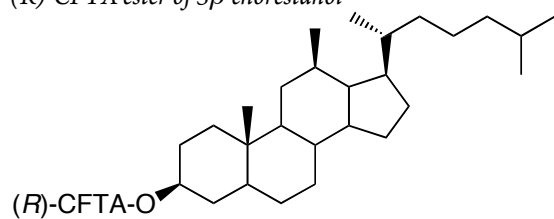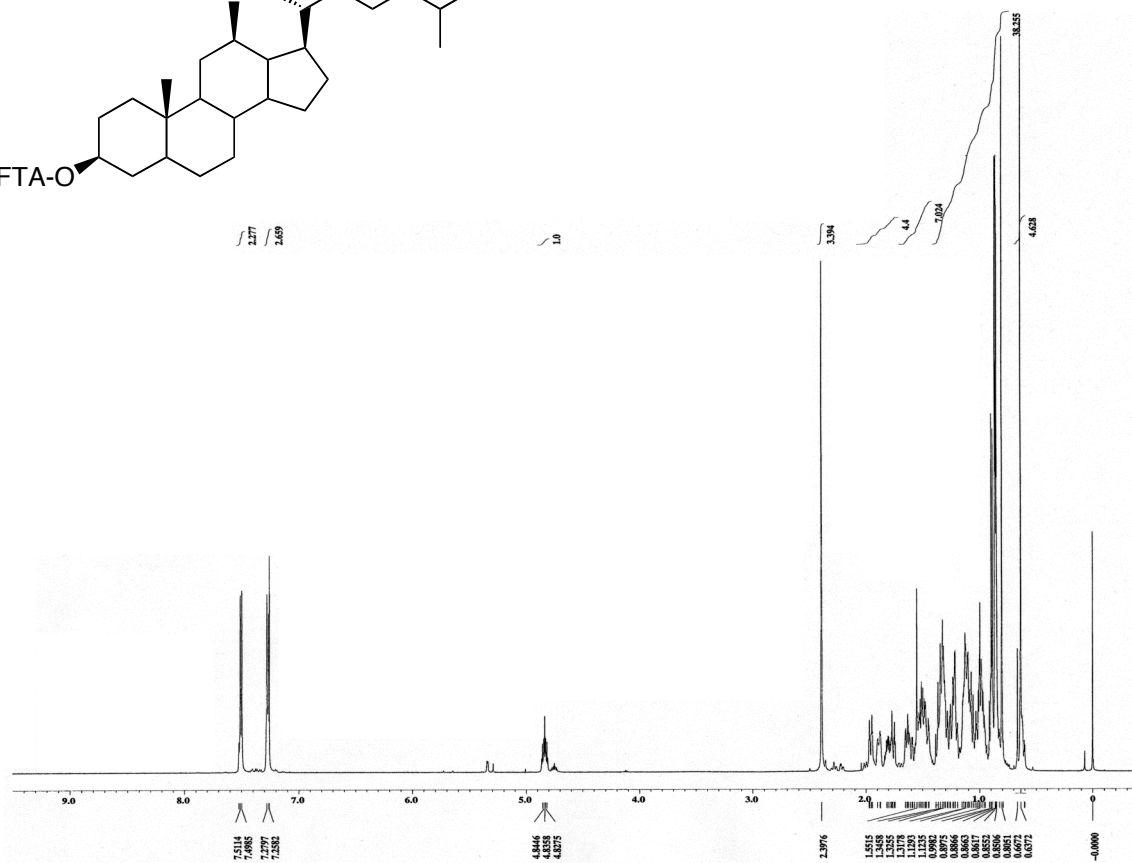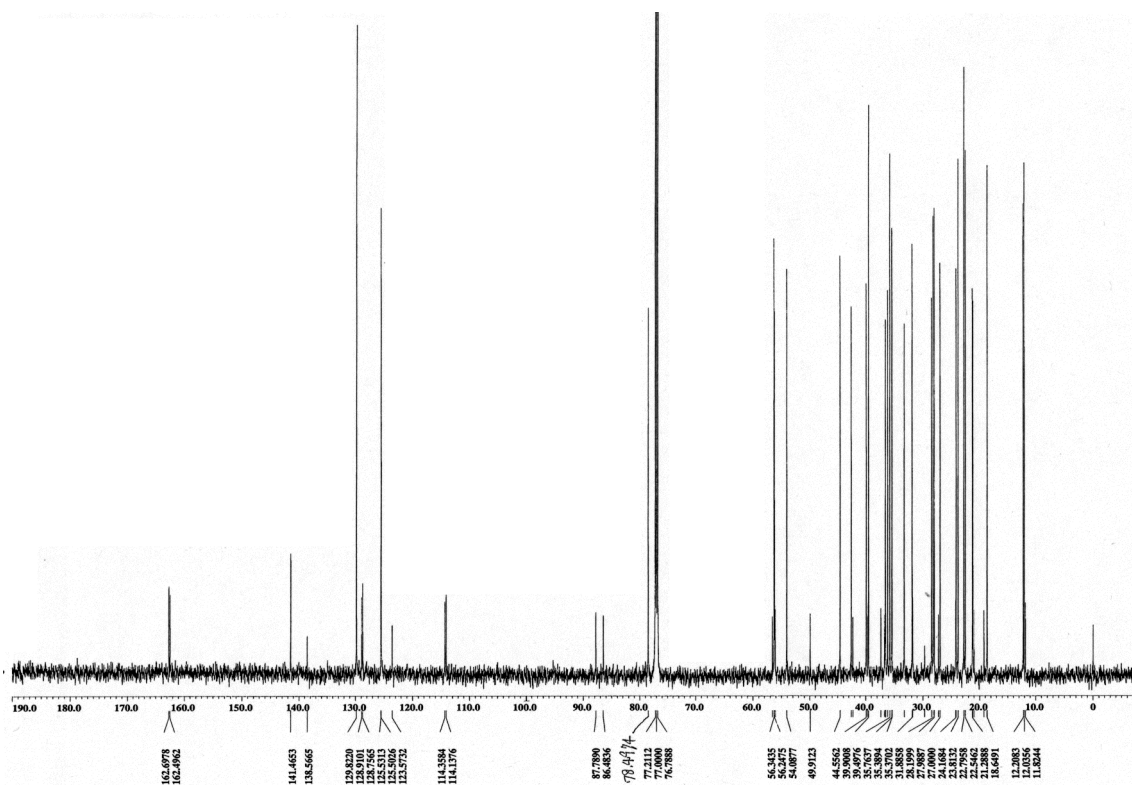

S-3. Structures of the CFTA esters examined and their  $^1\text{H}$  chemical shift difference values

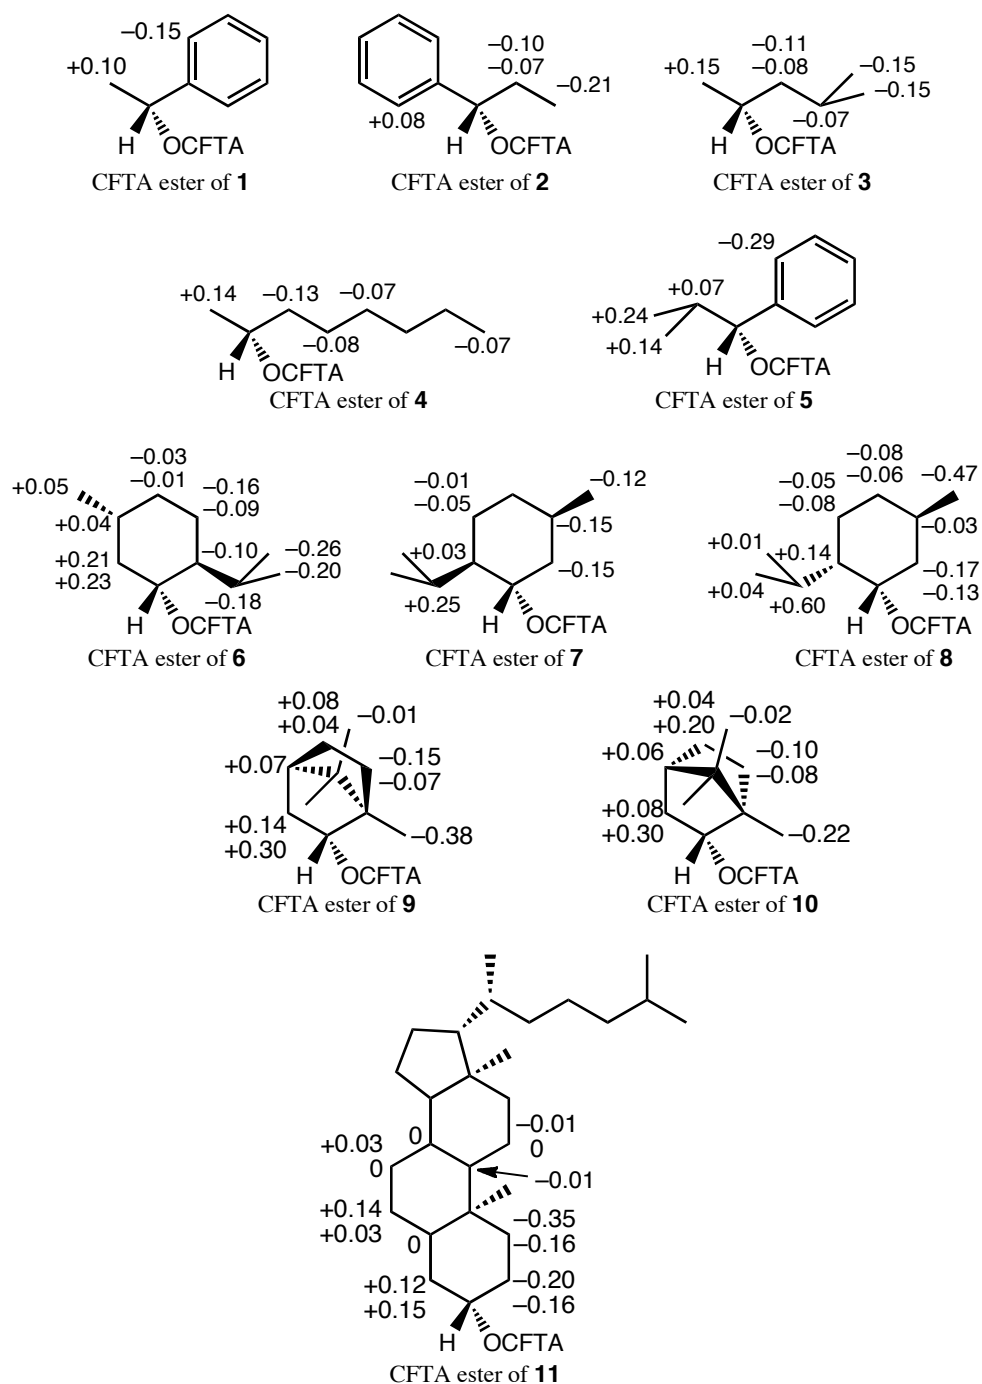

**Figure S1.** Chemical shift differences ( $\Delta\delta = \delta_{\text{S-CFTAester}} - \delta_{\text{R-CFTAester}}$ ) observed for the CFTA esters of chiral secondary alcohols **1–11** used in the IR study.



**S-4. IR measurement and curve-fitting.** Each solution used for the IR measurement was prepared by dissolving the CFTA esters of **1-11** in chloroform (0.1 M). IR spectra were recorded on a Shimadzu FTIR-8100M using a liquid cell (thickness: 0.1 mm, KBr window) at room temperature. Deconvolution of the carbonyl absorption signals were carried out by using the Origin 7 program with Gauss function. (*S*)-CFTA ester of **1**

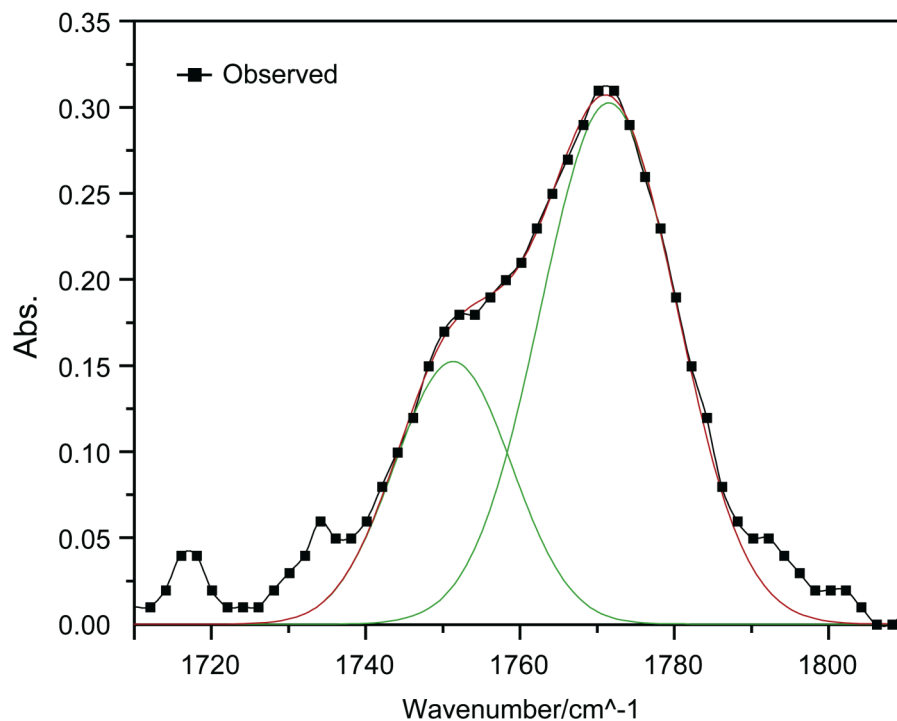

(*R*)-CFTA ester of **1**

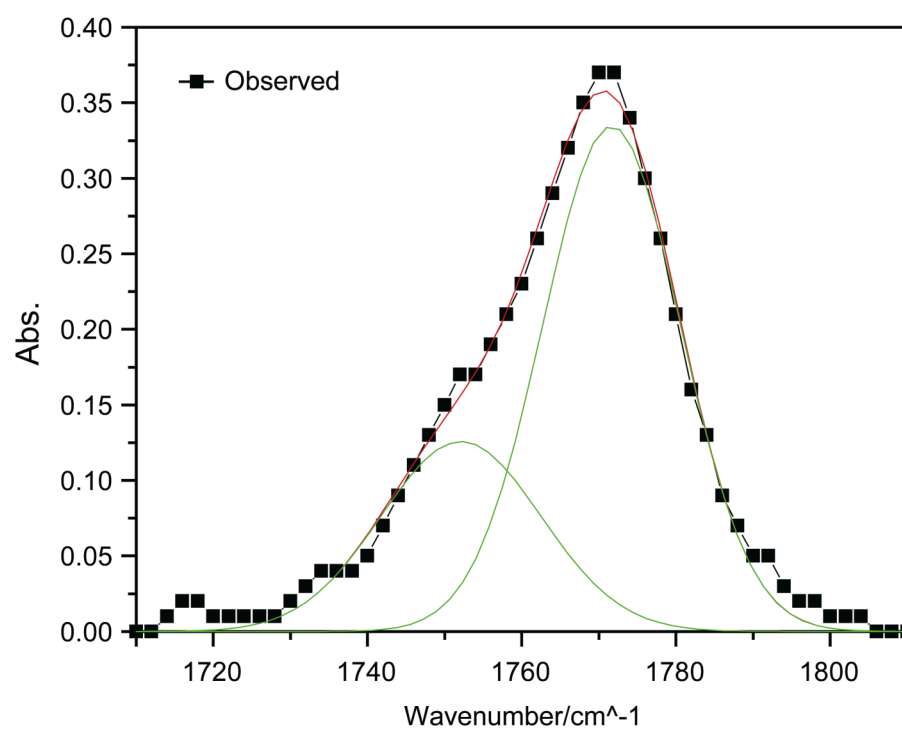

(*S*)-CFTA ester of **2**

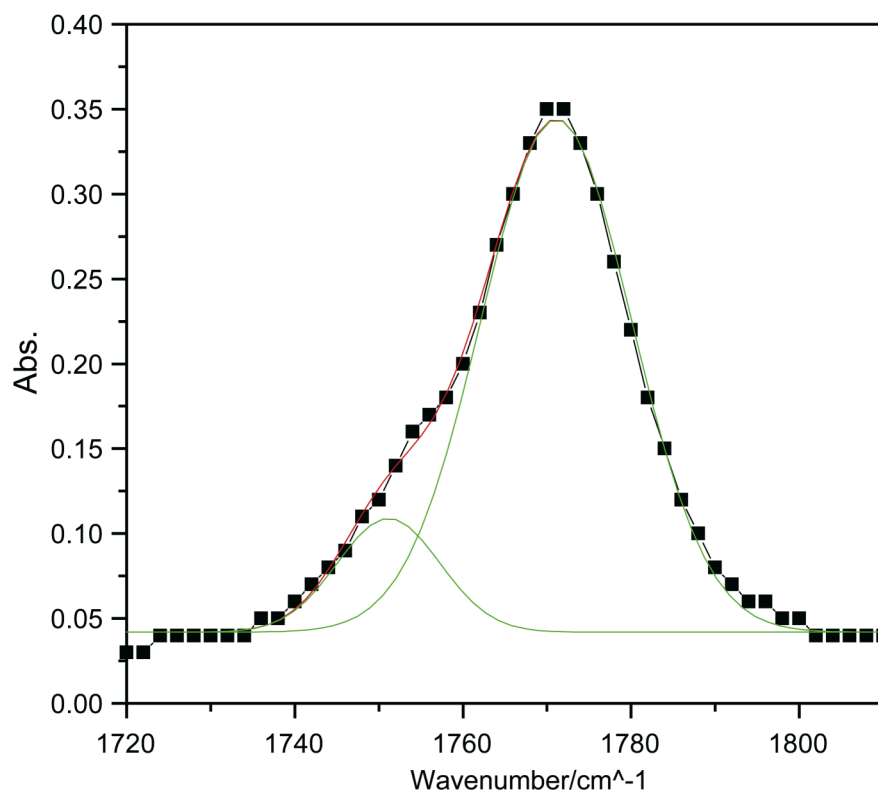

(*R*)-CFTA ester of **2**

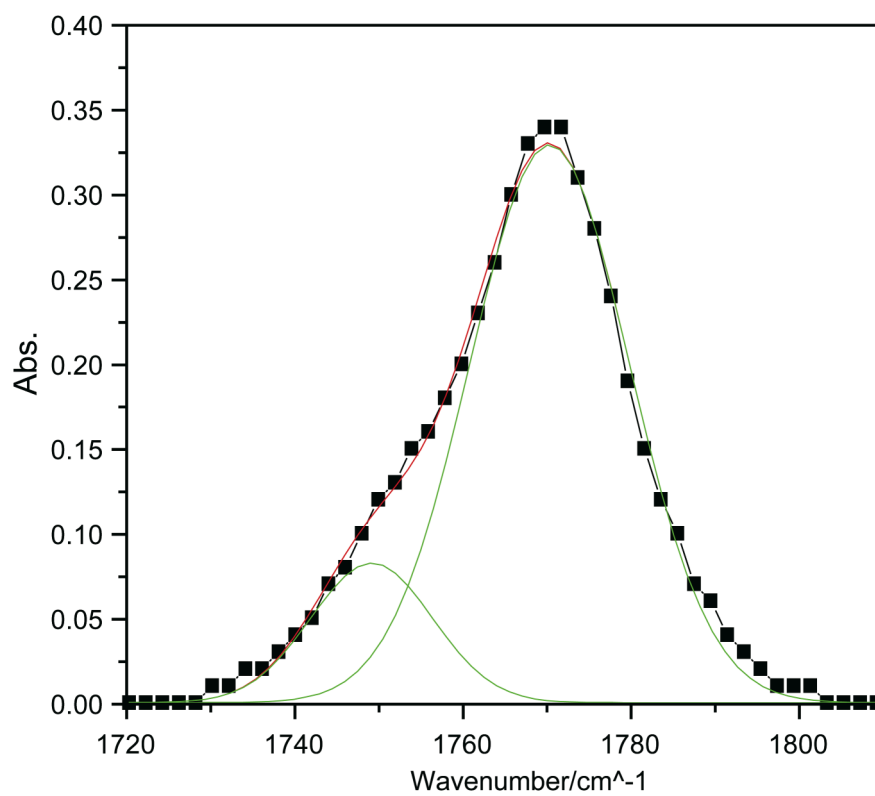

(*S*)-CFTA ester of **3**

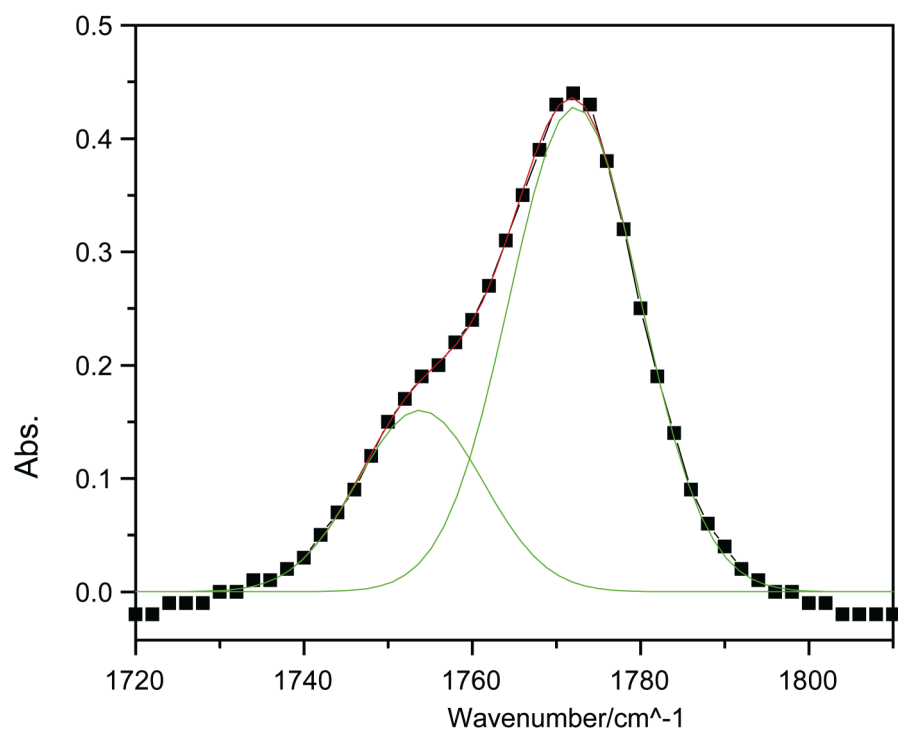

(*R*)-CFTA ester of **3**

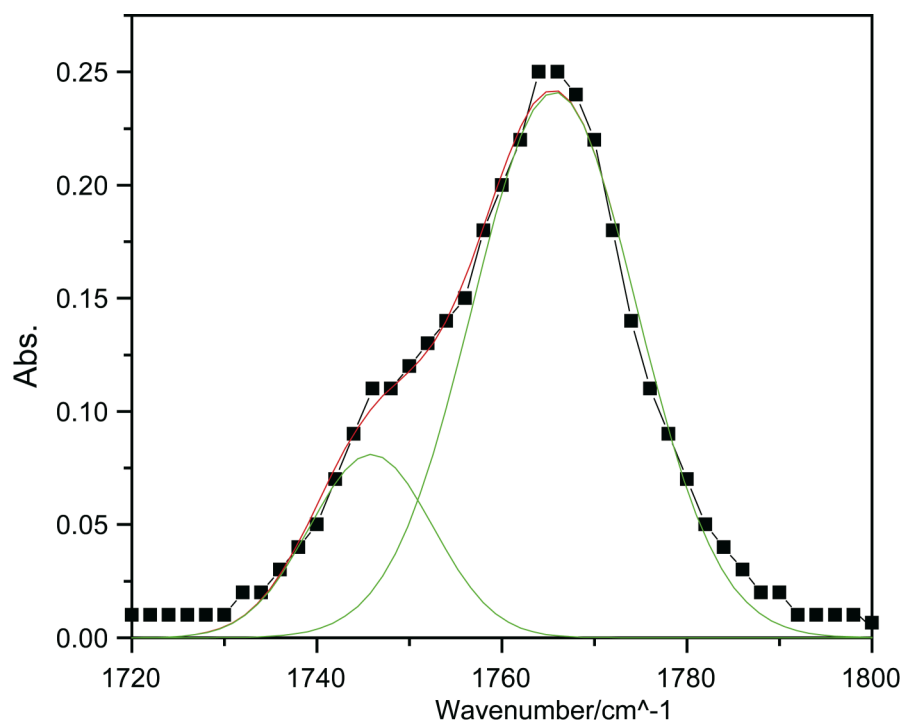

(*S*)-CFTA ester of **4**

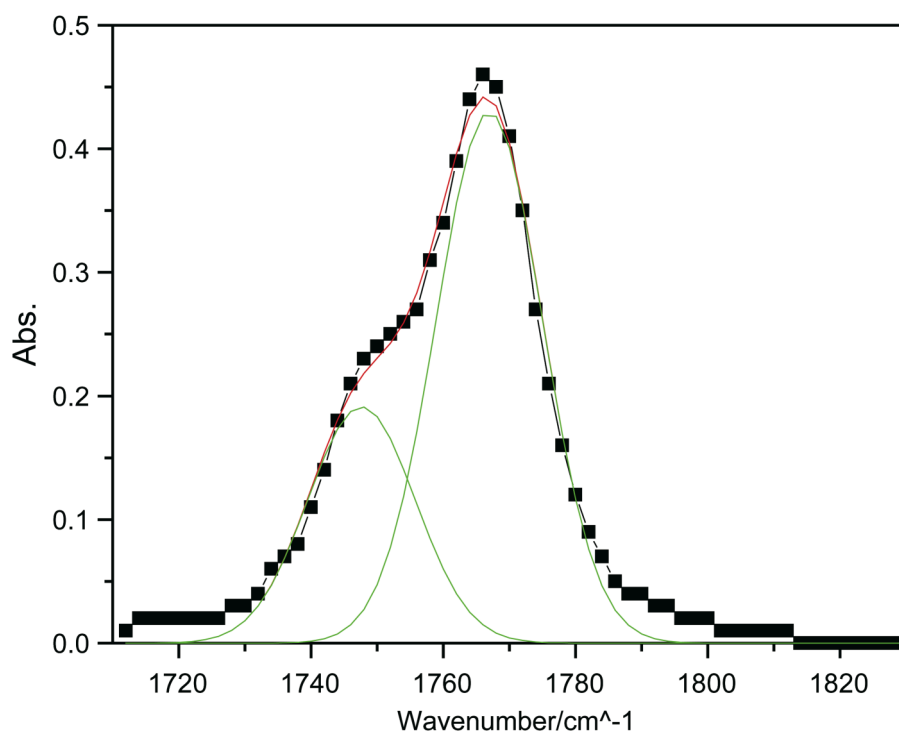

(*R*)-CFTA ester of **4**

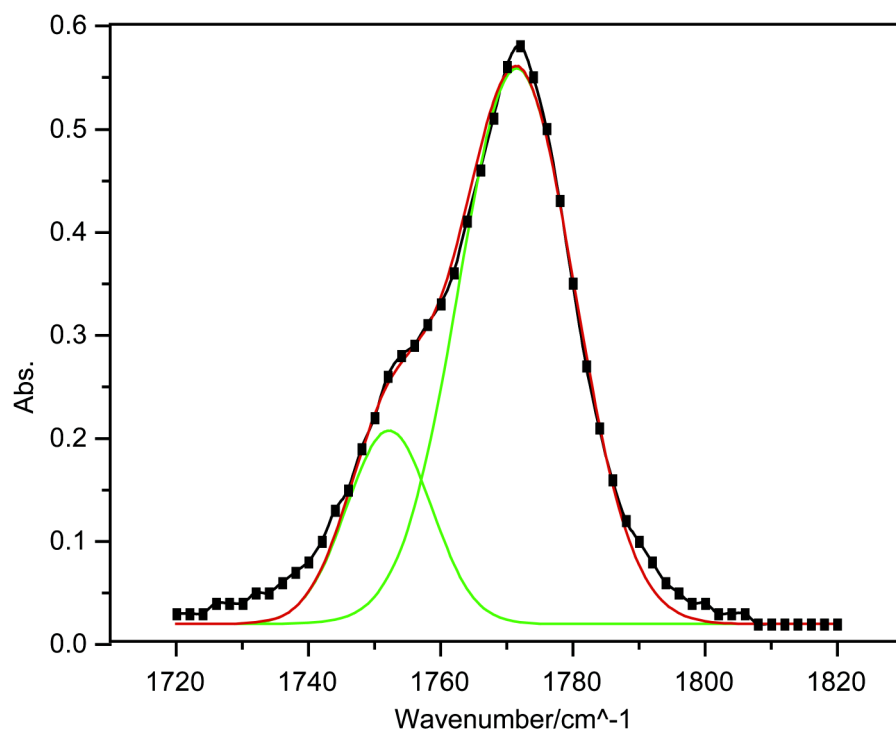

(*S*)-CFTA ester of **5**

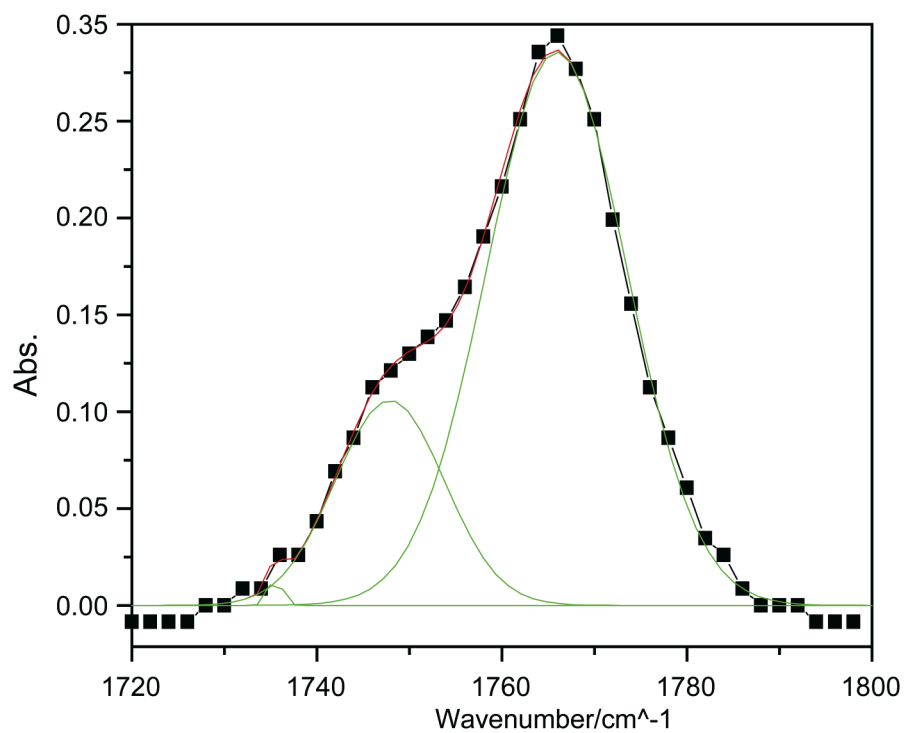

(*R*)-CFTA ester of **5**

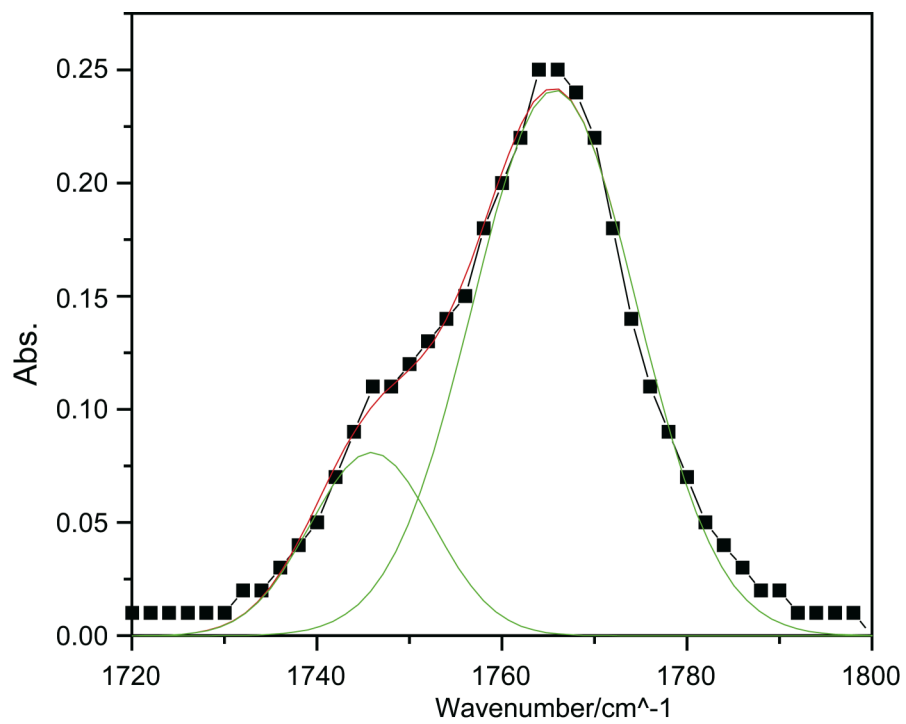

(*S*)-CFTA ester of **6**

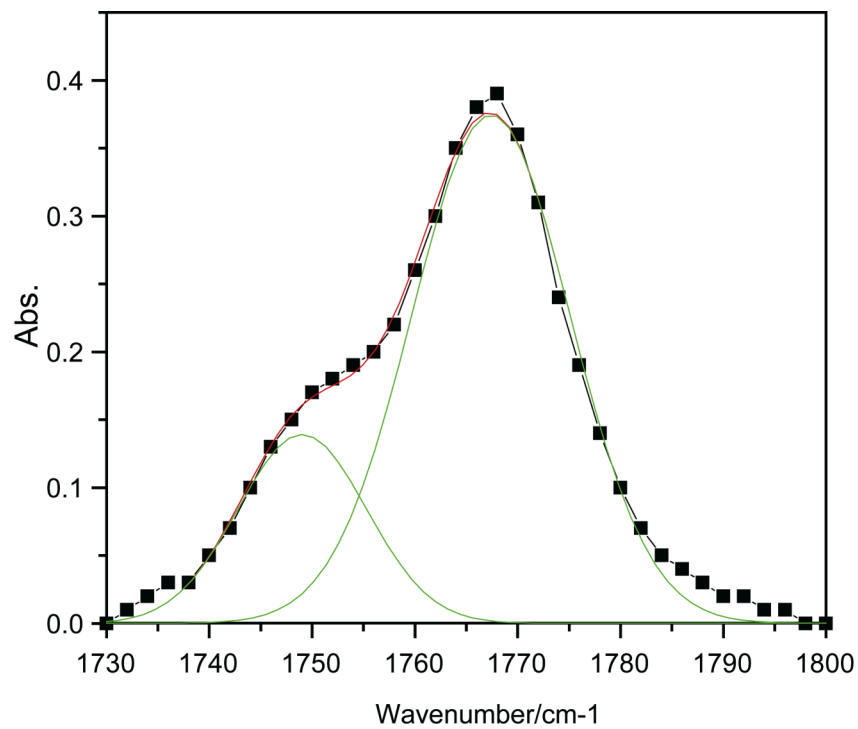

(*R*)-CFTA ester of **6**

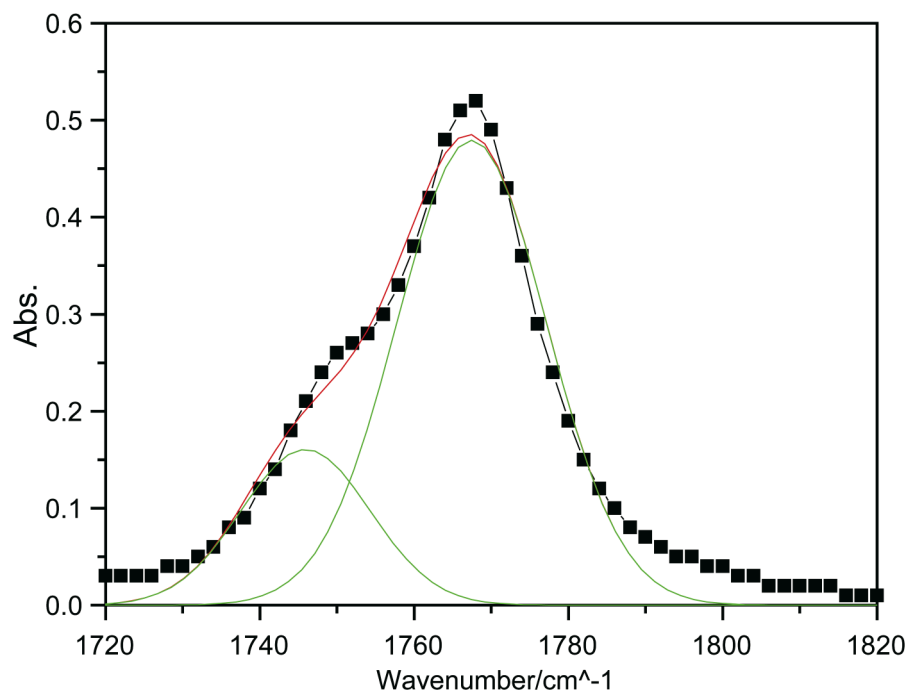

(*S*)-CFTA ester of 7

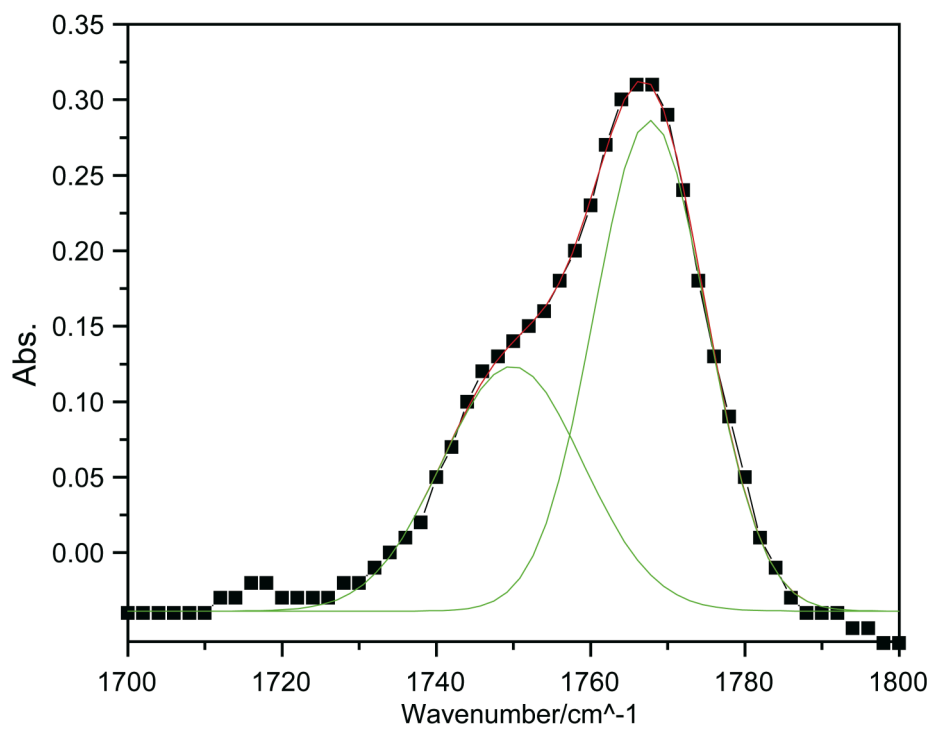

(*R*)-CFTA ester of 7

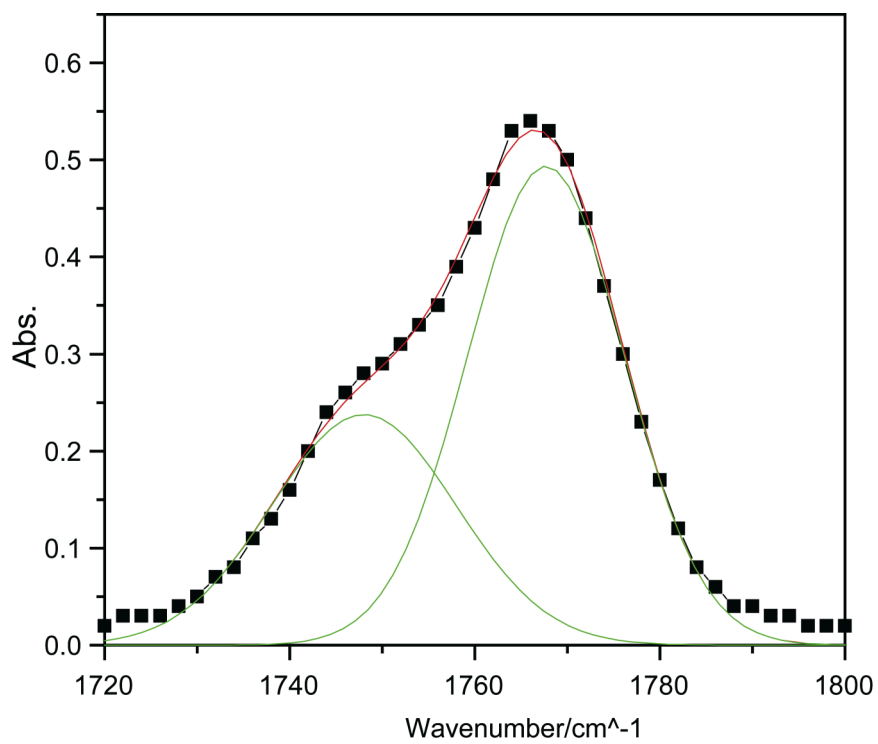

(*S*)-CFTA ester of **8**

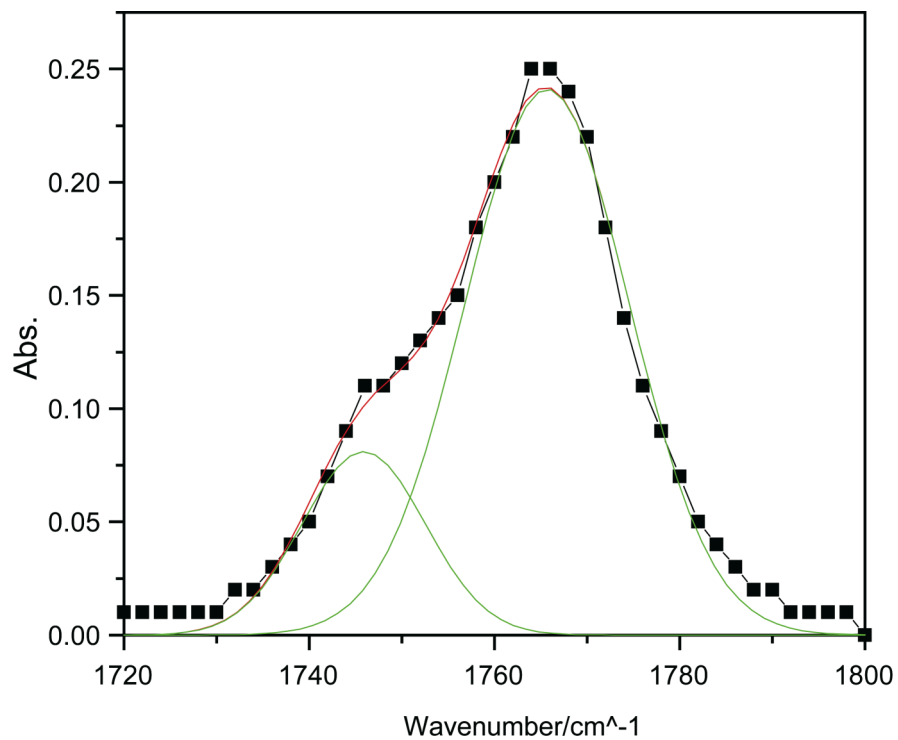

(*R*)-CFTA ester of **8**

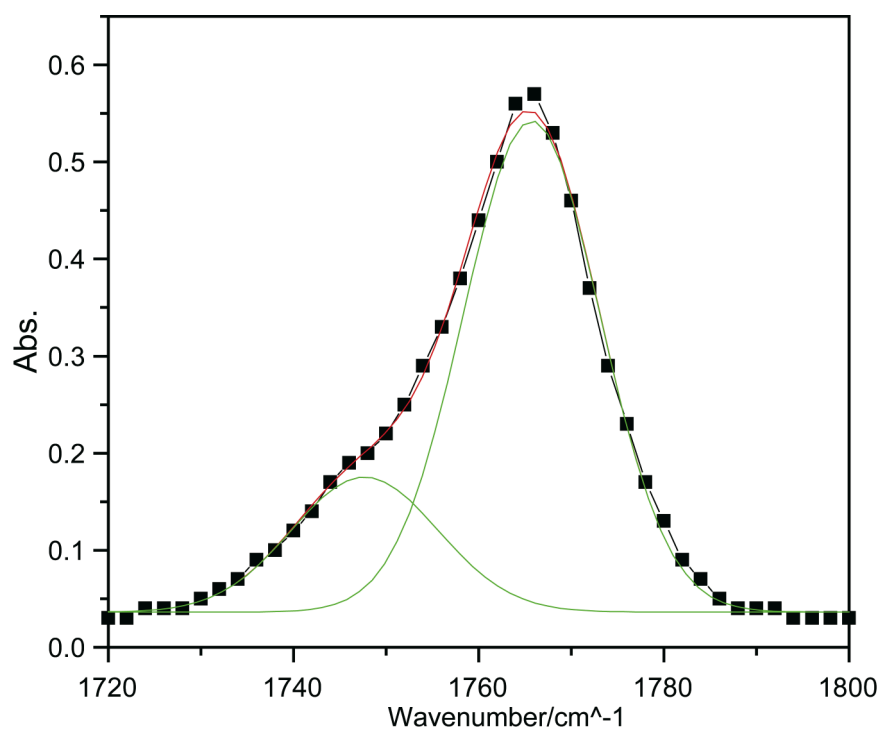



(*S*)-CFTA ester of **9**

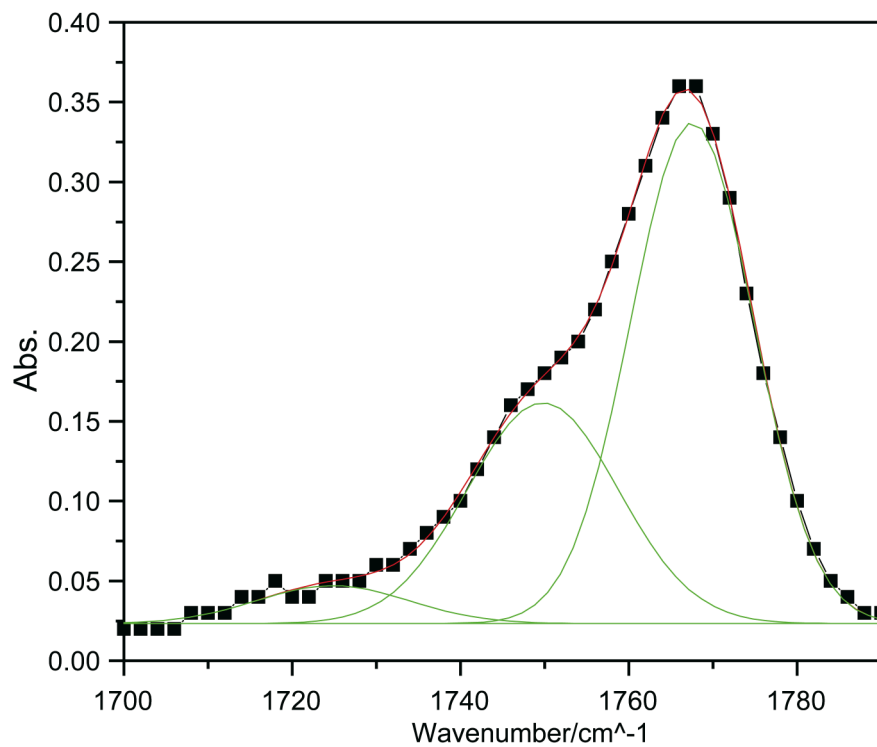

(*R*)-CFTA ester of **9**

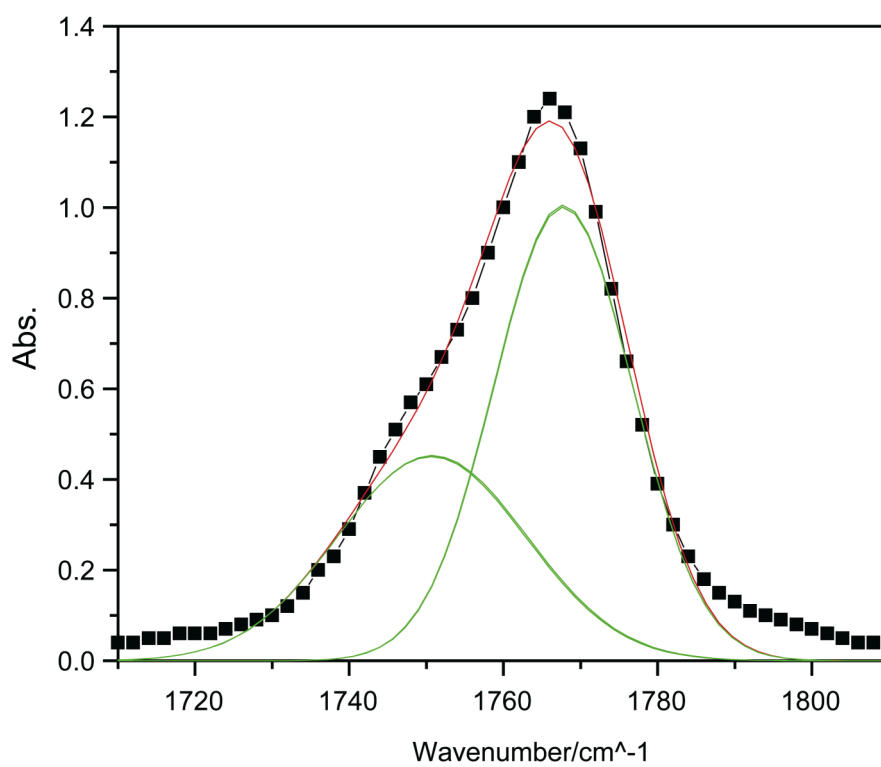

(*S*)-CFTA ester of **10**

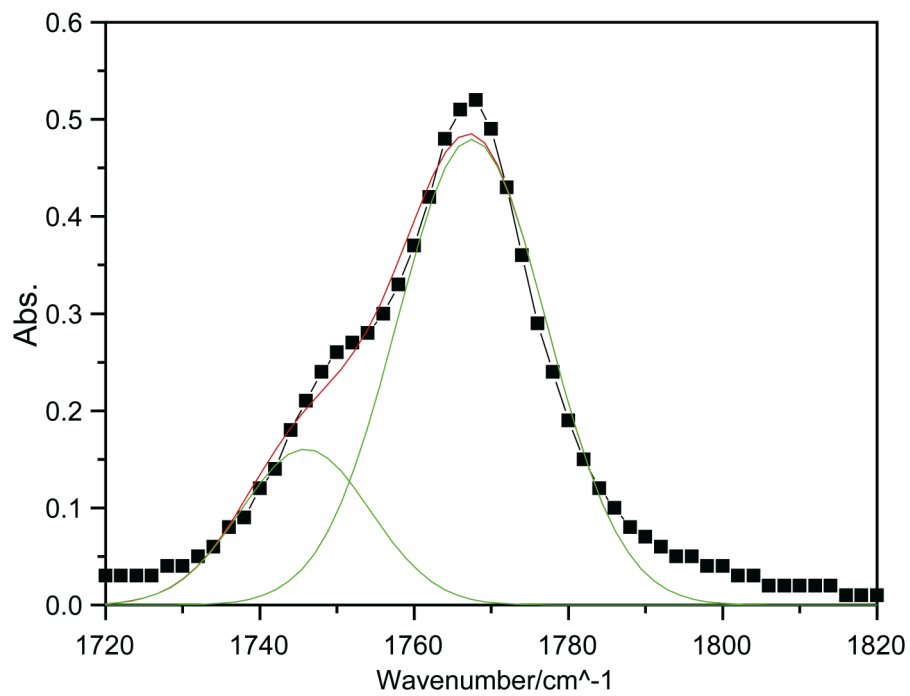

(*R*)-CFTA ester of **10**

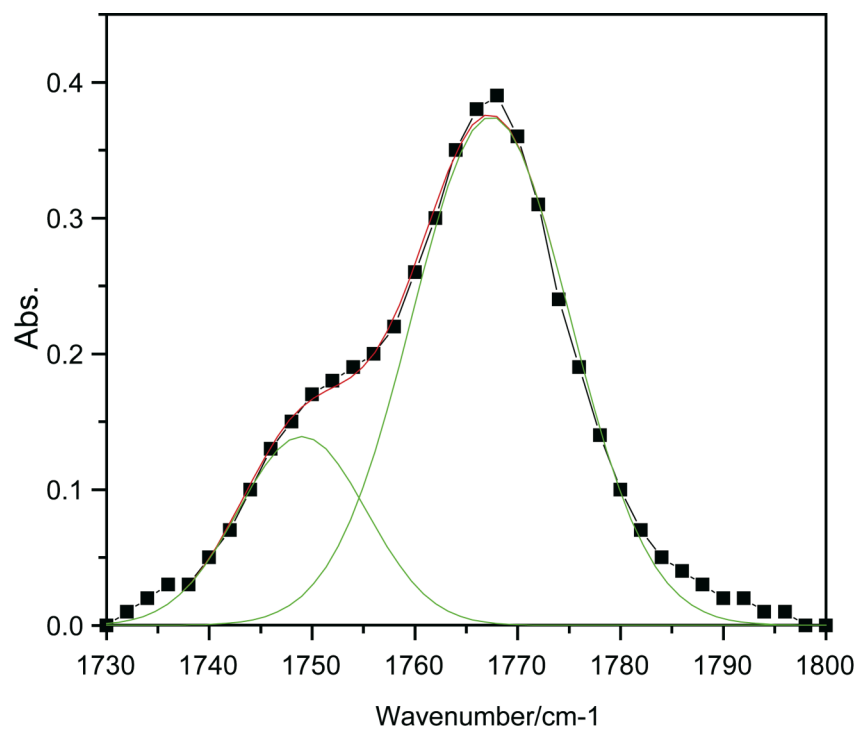

(*S*)-CFTA ester of **11**

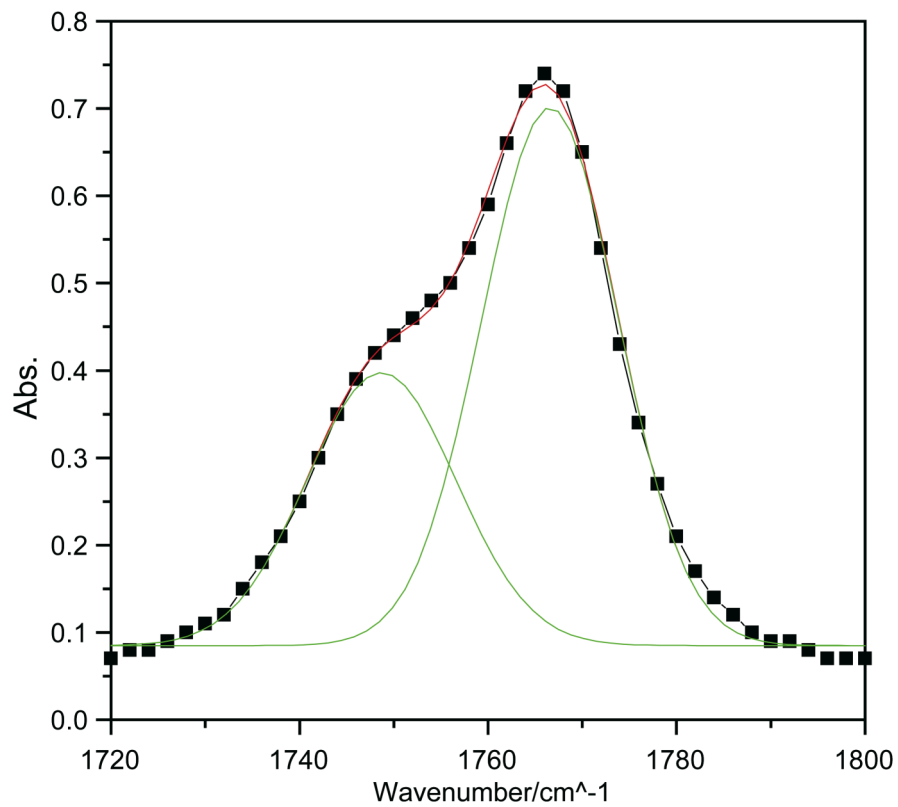

(*R*)-CFTA ester of **11**

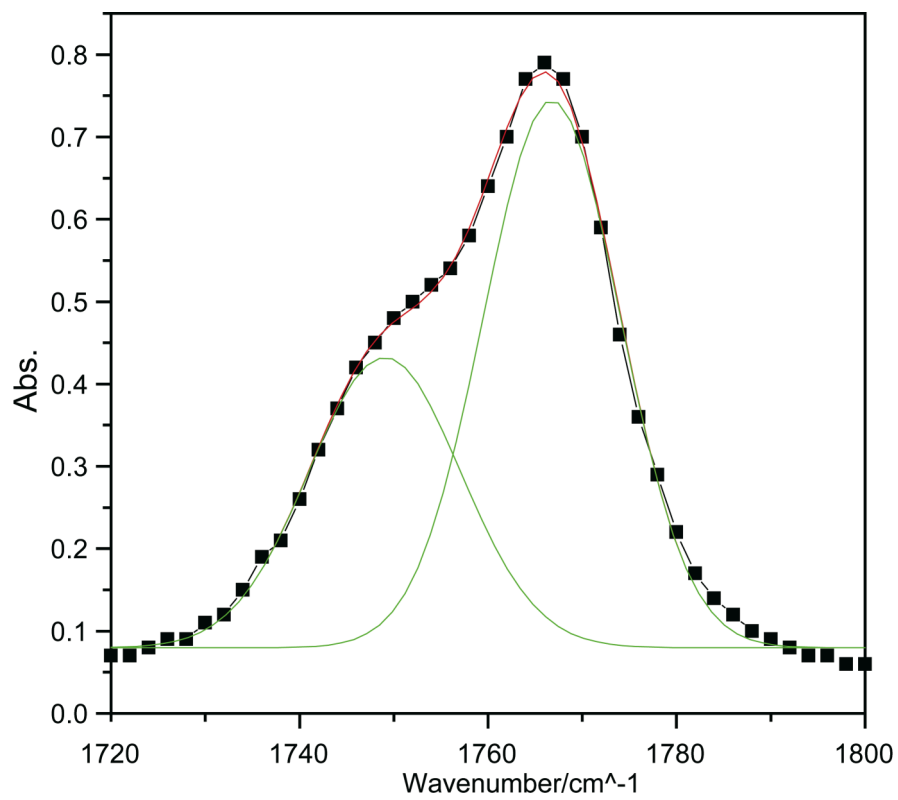

**Table S1.** Absorptions of C=O stretching bands observed for CFTA esters in CHCl<sub>3</sub> solutions.

| Alcohol moiety | (R)/(S) <sup>[a]</sup> | $\nu_{\text{C=O}} / \text{cm}^{-1}$ ( $A_{\text{max}}$ ) |             | $A_{\text{I}}/A_{\text{II}}$ <sup>[b]</sup> |
|----------------|------------------------|----------------------------------------------------------|-------------|---------------------------------------------|
|                |                        | Band I                                                   | Band II     |                                             |
| <b>1</b>       | S                      | 1772 (0.33)                                              | 1752 (0.13) | 2.3                                         |
|                | R                      | 1771 (0.30)                                              | 1751 (0.15) | 2.3                                         |
| <b>2</b>       | S                      | 1771 (0.27)                                              | 1750 (0.08) | 4.8                                         |
|                | R                      | 1771 (0.30)                                              | 1749 (0.07) | 6.6                                         |
| <b>3</b>       | S                      | 1766 (0.33)                                              | 1748 (0.12) | 3.5                                         |
|                | R                      | 1755 (0.24)                                              | 1746 (0.08) | 4.0                                         |
| <b>4</b>       | S                      | 1772 (0.30)                                              | 1754 (0.07) | 6.6                                         |
|                | R                      | 1771 (0.43)                                              | 1751 (0.19) | 2.2                                         |
| <b>5</b>       | S                      | 1771 (0.33)                                              | 1754 (0.08) | 5.3                                         |
|                | R                      | 1772 (0.33)                                              | 1752 (0.11) | 2.8                                         |
| <b>6</b>       | S                      | 1766 (0.39)                                              | 1748 (0.15) | 2.2                                         |
|                | R                      | 1766 (0.39)                                              | 1747 (0.16) | 2.3                                         |
| <b>7</b>       | S                      | 1768 (0.32)                                              | 1750 (0.16) | 1.6                                         |
|                | R                      | 1768 (0.49)                                              | 1748 (0.24) | 1.9                                         |
| <b>8</b>       | S                      | 1766 (0.32)                                              | 1756 (0.07) | 3.7                                         |
|                | R                      | 1766 (0.50)                                              | 1748 (0.14) | 3.4                                         |
| <b>9</b>       | S                      | 1767 (0.31)                                              | 1751 (0.14) | 1.8                                         |
|                | R                      | 1768 (1.00)                                              | 1751 (0.45) | 1.6                                         |
| <b>10</b>      | S                      | 1767 (0.37)                                              | 1749 (0.14) | 3.3                                         |
|                | R                      | 1767 (0.48)                                              | 1746 (0.16) | 3.5                                         |
| <b>11</b>      | S                      | 1767 (0.74)                                              | 1749 (0.43) | 2.4                                         |
|                | R                      | 1767 (0.70)                                              | 1749 (0.40) | 1.8                                         |

[a] Absolute configuration of CFTA moiety.

[b] Ratio of areas of Band I and Band II absorptions.

***S-5. Calculations.***

Full structure optimizations and vibrational analysis were conducted on Gaussian 03 program suite<sup>1</sup> using density fractional theory (B3LYP/6-31G(d)).

---

1) Gaussian 03, Revision D.01, M. J. Frisch, G. W. Trucks, H. B. Schlegel, G. E. Scuseria, M. A. Robb, J. R. Cheeseman, J. A. Montgomery, Jr., T. Vreven, K. N. Kudin, J. C. Burant, J. M. Millam, S. S. Iyengar, J. Tomasi, V. Barone, B. Mennucci, M. Cossi, G. Scalmani, N. Rega, G. A. Petersson, H. Nakatsuji, M. Hada, M. Ehara, K. Toyota, R. Fukuda, J. Hasegawa, M. Ishida, T. Nakajima, Y. Honda, O. Kitao, H. Nakai, M. Klene, X. Li, J. E. Knox, H. P. Hratchian, J. B. Cross, V. Bakken, C. Adamo, J. Jaramillo, R. Gomperts, R. E. Stratmann, O. Yazyev, A. J. Austin, R. Cammi, C. Pomelli, J. W. Ochterski, P. Y. Ayala, K. Morokuma, G. A. Voth, P. Salvador, J. J. Dannenberg, V. G. Zakrzewski, S. Dapprich, A. D. Daniels, M. C. Strain, O. Farkas, D. K. Malick, A. D. Rabuck, K. Raghavachari, J. B. Foresman, J. V. Ortiz, Q. Cui, A. G. Baboul, S. Clifford, J. Cioslowski, B. B. Stefanov, G. Liu, A. Liashenko, P. Piskorz, I. Komaromi, R. L. Martin, D. J. Fox, T. Keith, M. A. Al-Laham, C. Y. Peng, A. Nanayakkara, M. Challacombe, P. M. W. Gill, B. Johnson, W. Chen, M. W. Wong, C. Gonzalez, J. A. Pople, Gaussian, Inc., Wallingford, CT, **2004**.

*cartesian coordinates of the optimized structures.*

(*S*)-CFTA ester of **1**

*sp conformer*

| Center<br>Number | Atomic<br>Number | Atomic<br>Type | Coordinates (Angstroms) |           |           |
|------------------|------------------|----------------|-------------------------|-----------|-----------|
|                  |                  |                | X                       | Y         | Z         |
| 1                | 6                | 0              | -3.902499               | -0.478853 | -1.255689 |
| 2                | 6                | 0              | -4.682072               | -0.775532 | -0.131088 |
| 3                | 6                | 0              | -4.210975               | -0.365580 | 1.124509  |
| 4                | 6                | 0              | -6.004927               | -1.491620 | -0.266039 |
| 5                | 6                | 0              | -3.007244               | 0.321114  | 1.255042  |
| 6                | 6                | 0              | -2.246539               | 0.617897  | 0.118271  |
| 7                | 6                | 0              | -2.696088               | 0.211026  | -1.139318 |
| 8                | 6                | 0              | -0.915100               | 1.333347  | 0.316876  |
| 9                | 6                | 0              | 0.159882                | 0.304368  | 0.778162  |
| 10               | 9                | 0              | -1.031507               | 2.262596  | 1.337605  |
| 11               | 6                | 0              | -0.461145               | 2.049835  | -0.891953 |
| 12               | 8                | 0              | 0.471739                | 0.161966  | 1.931841  |
| 13               | 7                | 0              | -0.100742               | 2.617817  | -1.836730 |
| 14               | 8                | 0              | 0.596734                | -0.398684 | -0.271912 |
| 15               | 6                | 0              | 1.622129                | -1.417751 | -0.020722 |
| 16               | 6                | 0              | 1.438179                | -2.458566 | -1.120038 |
| 17               | 6                | 0              | 2.996684                | -0.780634 | -0.012442 |
| 18               | 6                | 0              | 3.936949                | -1.166949 | 0.948148  |
| 19               | 6                | 0              | 5.225230                | -0.630241 | 0.934383  |
| 20               | 6                | 0              | 5.579950                | 0.308554  | -0.035070 |
| 21               | 6                | 0              | 4.641966                | 0.707490  | -0.990164 |
| 22               | 6                | 0              | 3.358151                | 0.163072  | -0.983095 |
| 23               | 1                | 0              | -4.244578               | -0.786595 | -2.240825 |
| 24               | 1                | 0              | -4.795453               | -0.587115 | 2.014405  |
| 25               | 1                | 0              | -6.182219               | -2.168279 | 0.576913  |
| 26               | 1                | 0              | -6.051054               | -2.078577 | -1.188914 |
| 27               | 1                | 0              | -6.839344               | -0.778219 | -0.289579 |
| 28               | 1                | 0              | -2.655733               | 0.632245  | 2.233114  |
| 29               | 1                | 0              | -2.113360               | 0.434901  | -2.027904 |
| 30               | 1                | 0              | 1.412691                | -1.851677 | 0.960333  |
| 31               | 1                | 0              | 1.602789                | -2.013523 | -2.106330 |
| 32               | 1                | 0              | 0.428522                | -2.880445 | -1.086800 |
| 33               | 1                | 0              | 2.163092                | -3.267231 | -0.983894 |
| 34               | 1                | 0              | 3.657856                | -1.885385 | 1.715535  |
| 35               | 1                | 0              | 5.945744                | -0.936586 | 1.687932  |
| 36               | 1                | 0              | 6.579997                | 0.733635  | -0.042425 |
| 37               | 1                | 0              | 4.908974                | 1.445782  | -1.741395 |
| 38               | 1                | 0              | 2.627856                | 0.486862  | -1.719574 |

(S)-CFTA ester of **1**

*ap conformer*

| Center<br>Number | Atomic<br>Number | Atomic<br>Type | Coordinates (Angstroms) |           |           |
|------------------|------------------|----------------|-------------------------|-----------|-----------|
|                  |                  |                | X                       | Y         | Z         |
| 1                | 6                | 0              | 3.628862                | 1.070257  | -1.184226 |
| 2                | 6                | 0              | 3.727042                | 2.115642  | -0.252832 |
| 3                | 6                | 0              | 3.027454                | 1.989941  | 0.951453  |
| 4                | 6                | 0              | 4.563407                | 3.337188  | -0.552233 |
| 5                | 6                | 0              | 2.252228                | 0.862280  | 1.227710  |
| 6                | 6                | 0              | 2.169534                | -0.166263 | 0.289705  |
| 7                | 6                | 0              | 2.861197                | -0.059916 | -0.923132 |
| 8                | 6                | 0              | 1.309388                | -1.397300 | 0.584215  |
| 9                | 6                | 0              | 0.141170                | -1.471065 | -0.436900 |
| 10               | 9                | 0              | 0.800225                | -1.324769 | 1.871298  |
| 11               | 6                | 0              | 2.101404                | -2.643622 | 0.497308  |
| 12               | 8                | 0              | 0.305703                | -1.870839 | -1.567126 |
| 13               | 7                | 0              | 2.734030                | -3.614610 | 0.459224  |
| 14               | 8                | 0              | -0.983486               | -0.997481 | 0.089288  |
| 15               | 6                | 0              | -2.163967               | -0.956055 | -0.786079 |
| 16               | 6                | 0              | -2.854999               | -2.317574 | -0.729450 |
| 17               | 6                | 0              | -3.031666               | 0.185813  | -0.308193 |
| 18               | 6                | 0              | -3.636657               | 1.033024  | -1.242458 |
| 19               | 6                | 0              | -4.489377               | 2.056513  | -0.825121 |
| 20               | 6                | 0              | -4.735146               | 2.248885  | 0.534613  |
| 21               | 6                | 0              | -4.126273               | 1.412775  | 1.473756  |
| 22               | 6                | 0              | -3.282947               | 0.384245  | 1.055838  |
| 23               | 1                | 0              | 4.163850                | 1.141090  | -2.128420 |
| 24               | 1                | 0              | 3.087069                | 2.784997  | 1.690665  |
| 25               | 1                | 0              | 4.570222                | 4.034490  | 0.291085  |
| 26               | 1                | 0              | 4.181501                | 3.875796  | -1.428452 |
| 27               | 1                | 0              | 5.602947                | 3.064559  | -0.770973 |
| 28               | 1                | 0              | 1.718092                | 0.783226  | 2.167182  |
| 29               | 1                | 0              | 2.793501                | -0.855218 | -1.659023 |
| 30               | 1                | 0              | -1.806236               | -0.764780 | -1.800809 |
| 31               | 1                | 0              | -3.158446               | -2.552482 | 0.295713  |
| 32               | 1                | 0              | -2.187351               | -3.102105 | -1.097731 |
| 33               | 1                | 0              | -3.751860               | -2.300987 | -1.357264 |
| 34               | 1                | 0              | -3.439300               | 0.892752  | -2.303015 |
| 35               | 1                | 0              | -4.952678               | 2.707125  | -1.561903 |
| 36               | 1                | 0              | -5.393402               | 3.048957  | 0.862299  |
| 37               | 1                | 0              | -4.308252               | 1.562459  | 2.534634  |
| 38               | 1                | 0              | -2.801550               | -0.256727 | 1.788623  |

(*R*)-CFTA ester of **1**

*sp conformer*

| Center<br>Number | Atomic<br>Number | Atomic<br>Type | Coordinates (Angstroms) |           |           |
|------------------|------------------|----------------|-------------------------|-----------|-----------|
|                  |                  |                | X                       | Y         | Z         |
| 1                | 6                | 0              | -2.331617               | 2.031586  | 0.733053  |
| 2                | 6                | 0              | -3.382809               | 2.192285  | -0.180761 |
| 3                | 6                | 0              | -3.792661               | 1.073403  | -0.915801 |
| 4                | 6                | 0              | -4.065817               | 3.529166  | -0.346746 |
| 5                | 6                | 0              | -3.183110               | -0.168772 | -0.745219 |
| 6                | 6                | 0              | -2.145701               | -0.311774 | 0.179347  |
| 7                | 6                | 0              | -1.715457               | 0.796314  | 0.915857  |
| 8                | 6                | 0              | -1.460492               | -1.670017 | 0.310226  |
| 9                | 6                | 0              | -0.230433               | -1.719411 | -0.643282 |
| 10               | 9                | 0              | -2.317995               | -2.674248 | -0.103603 |
| 11               | 6                | 0              | -1.062819               | -1.967277 | 1.701704  |
| 12               | 8                | 0              | -0.282004               | -2.201643 | -1.746143 |
| 13               | 7                | 0              | -0.758657               | -2.204664 | 2.795408  |
| 14               | 8                | 0              | 0.813194                | -1.109258 | -0.077064 |
| 15               | 6                | 0              | 2.042180                | -0.989713 | -0.874826 |
| 16               | 6                | 0              | 2.786177                | 0.221448  | -0.360717 |
| 17               | 6                | 0              | 2.833034                | -2.291472 | -0.754428 |
| 18               | 6                | 0              | 2.958546                | 0.434448  | 1.013697  |
| 19               | 6                | 0              | 3.689082                | 1.530947  | 1.469477  |
| 20               | 6                | 0              | 4.263585                | 2.421380  | 0.558778  |
| 21               | 6                | 0              | 4.096739                | 2.214295  | -0.810651 |
| 22               | 6                | 0              | 3.356213                | 1.121998  | -1.266384 |
| 23               | 1                | 0              | -1.990240               | 2.885605  | 1.313264  |
| 24               | 1                | 0              | -4.602355               | 1.172585  | -1.634787 |
| 25               | 1                | 0              | -4.597593               | 3.591474  | -1.301554 |
| 26               | 1                | 0              | -3.346912               | 4.354755  | -0.303566 |
| 27               | 1                | 0              | -4.801573               | 3.698726  | 0.450550  |
| 28               | 1                | 0              | -3.512114               | -1.025178 | -1.322805 |
| 29               | 1                | 0              | -0.903742               | 0.697095  | 1.630227  |
| 30               | 1                | 0              | 1.735312                | -0.837260 | -1.912828 |
| 31               | 1                | 0              | 3.764363                | -2.208575 | -1.324384 |
| 32               | 1                | 0              | 2.254712                | -3.129997 | -1.153033 |
| 33               | 1                | 0              | 3.087608                | -2.491654 | 0.291193  |
| 34               | 1                | 0              | 2.507262                | -0.251774 | 1.724800  |
| 35               | 1                | 0              | 3.811325                | 1.690174  | 2.537525  |
| 36               | 1                | 0              | 4.834780                | 3.274004  | 0.916074  |
| 37               | 1                | 0              | 4.534548                | 2.905730  | -1.525593 |
| 38               | 1                | 0              | 3.219813                | 0.969363  | -2.334811 |



(*R*)-CFTA ester of **1**

*ap conformer*

| Center<br>Number | Atomic<br>Number | Atomic<br>Type | Coordinates (Angstroms) |           |           |
|------------------|------------------|----------------|-------------------------|-----------|-----------|
|                  |                  |                | X                       | Y         | Z         |
| 1                | 6                | 0              | -4.081108               | -0.141777 | -1.294924 |
| 2                | 6                | 0              | -4.805297               | -0.713978 | -0.237757 |
| 3                | 6                | 0              | -4.235400               | -0.687270 | 1.039194  |
| 4                | 6                | 0              | -6.165334               | -1.325844 | -0.477512 |
| 5                | 6                | 0              | -2.986352               | -0.106478 | 1.265641  |
| 6                | 6                | 0              | -2.285165               | 0.461644  | 0.202375  |
| 7                | 6                | 0              | -2.835554               | 0.441262  | -1.084809 |
| 8                | 6                | 0              | -0.909581               | 1.087456  | 0.444672  |
| 9                | 6                | 0              | 0.167441                | 0.287163  | -0.337168 |
| 10               | 9                | 0              | -0.612500               | 1.070175  | 1.798718  |
| 11               | 6                | 0              | -0.875890               | 2.499641  | 0.006716  |
| 12               | 8                | 0              | 0.349630                | 0.448181  | -1.521197 |
| 13               | 7                | 0              | -0.870444               | 3.615701  | -0.307535 |
| 14               | 8                | 0              | 0.766096                | -0.600467 | 0.454074  |
| 15               | 6                | 0              | 1.795340                | -1.450494 | -0.162584 |
| 16               | 6                | 0              | 3.131444                | -0.738091 | -0.143695 |
| 17               | 6                | 0              | 1.778109                | -2.749582 | 0.635040  |
| 18               | 6                | 0              | 3.611080                | -0.144950 | 1.031859  |
| 19               | 6                | 0              | 4.859562                | 0.474893  | 1.049497  |
| 20               | 6                | 0              | 5.645824                | 0.502490  | -0.105104 |
| 21               | 6                | 0              | 5.172989                | -0.083756 | -1.279416 |
| 22               | 6                | 0              | 3.918321                | -0.695430 | -1.298879 |
| 23               | 1                | 0              | -4.499841               | -0.151394 | -2.298532 |
| 24               | 1                | 0              | -4.774773               | -1.126007 | 1.875185  |
| 25               | 1                | 0              | -6.523956               | -1.863553 | 0.405586  |
| 26               | 1                | 0              | -6.144807               | -2.030697 | -1.316990 |
| 27               | 1                | 0              | -6.908677               | -0.556330 | -0.722057 |
| 28               | 1                | 0              | -2.561801               | -0.093681 | 2.262569  |
| 29               | 1                | 0              | -2.287980               | 0.873727  | -1.916667 |
| 30               | 1                | 0              | 1.490048                | -1.628243 | -1.196495 |
| 31               | 1                | 0              | 2.512087                | -3.445601 | 0.216747  |
| 32               | 1                | 0              | 0.787930                | -3.214436 | 0.592973  |
| 33               | 1                | 0              | 2.036681                | -2.567794 | 1.682801  |
| 34               | 1                | 0              | 2.996263                | -0.153371 | 1.927871  |
| 35               | 1                | 0              | 5.218723                | 0.938553  | 1.964306  |
| 36               | 1                | 0              | 6.619016                | 0.985648  | -0.090232 |
| 37               | 1                | 0              | 5.773757                | -0.055765 | -2.184399 |
| 38               | 1                | 0              | 3.544564                | -1.135643 | -2.220274 |

(S)-CFTA ester of **9**

*sp conformer*

| Center<br>Number | Atomic<br>Number | Atomic<br>Type | Coordinates (Angstroms) |           |           |
|------------------|------------------|----------------|-------------------------|-----------|-----------|
|                  |                  |                | X                       | Y         | Z         |
| 1                | 6                | 0              | 3.796595                | 0.018309  | 0.798266  |
| 2                | 6                | 0              | 4.615741                | 0.215677  | -0.498124 |
| 3                | 6                | 0              | 2.972623                | -1.278466 | 0.613775  |
| 4                | 6                | 0              | 2.709626                | 1.134466  | 0.697903  |
| 5                | 6                | 0              | 3.520006                | 0.616899  | -1.533821 |
| 6                | 6                | 0              | 2.196833                | 0.631460  | -0.706547 |
| 7                | 6                | 0              | 1.926653                | -0.879368 | -0.457302 |
| 8                | 6                | 0              | 1.669122                | 1.101006  | 1.833655  |
| 9                | 8                | 0              | 0.584999                | -1.143775 | 0.069741  |
| 10               | 6                | 0              | 1.055531                | 1.386421  | -1.375166 |
| 11               | 6                | 0              | 3.284630                | 2.564374  | 0.676669  |
| 12               | 6                | 0              | -0.327998               | -1.661646 | -0.754878 |
| 13               | 6                | 0              | -1.679734               | -1.852026 | -0.003394 |
| 14               | 8                | 0              | -0.200945               | -1.921324 | -1.925021 |
| 15               | 9                | 0              | -2.414416               | -2.763347 | -0.747320 |
| 16               | 6                | 0              | -2.420384               | -0.521125 | 0.046632  |
| 17               | 6                | 0              | -1.459724               | -2.441466 | 1.331871  |
| 18               | 7                | 0              | -1.296792               | -2.915316 | 2.377736  |
| 19               | 6                | 0              | -2.995401               | -0.052423 | -1.141690 |
| 20               | 6                | 0              | -2.513464               | 0.247735  | 1.207879  |
| 21               | 6                | 0              | -3.180544               | 1.473112  | 1.178412  |
| 22               | 6                | 0              | -3.767850               | 1.953149  | 0.002282  |
| 23               | 6                | 0              | -4.517730               | 3.263877  | -0.018335 |
| 24               | 6                | 0              | -3.660923               | 1.169135  | -1.156543 |
| 25               | 1                | 0              | 4.396141                | 0.026469  | 1.714205  |
| 26               | 1                | 0              | 5.147566                | -0.698743 | -0.782247 |
| 27               | 1                | 0              | 5.370529                | 0.999891  | -0.385205 |
| 28               | 1                | 0              | 2.465499                | -1.583991 | 1.532484  |
| 29               | 1                | 0              | 3.591132                | -2.121466 | 0.288458  |
| 30               | 1                | 0              | 3.456096                | -0.080434 | -2.376682 |
| 31               | 1                | 0              | 3.709243                | 1.605820  | -1.962570 |
| 32               | 1                | 0              | 2.002824                | -1.449508 | -1.383449 |
| 33               | 1                | 0              | 0.875662                | 1.835350  | 1.649607  |
| 34               | 1                | 0              | 2.148201                | 1.373580  | 2.782429  |
| 35               | 1                | 0              | 1.187319                | 0.132808  | 1.969155  |
| 36               | 1                | 0              | 0.152543                | 1.392133  | -0.755969 |
| 37               | 1                | 0              | 0.795664                | 0.930474  | -2.337709 |
| 38               | 1                | 0              | 1.337909                | 2.428079  | -1.566443 |
| 39               | 1                | 0              | 2.481361                | 3.298344  | 0.541550  |
| 40               | 1                | 0              | 4.022933                | 2.738578  | -0.109373 |
| 41               | 1                | 0              | 3.766976                | 2.787899  | 1.636063  |
| 42               | 1                | 0              | -2.920012               | -0.648155 | -2.045589 |
| 43               | 1                | 0              | -2.074683               | -0.106167 | 2.135880  |
| 44               | 1                | 0              | -3.249614               | 2.061092  | 2.090279  |
| 45               | 1                | 0              | -4.312391               | 3.828544  | -0.934552 |
| 46               | 1                | 0              | -4.249500               | 3.893224  | 0.836043  |
| 47               | 1                | 0              | -5.602394               | 3.098751  | 0.022752  |
| 48               | 1                | 0              | -4.105789               | 1.520958  | -2.084418 |

(S)-CFTA ester of **9**

*ap conformer*

| Center<br>Number | Atomic<br>Number | Atomic<br>Type | Coordinates (Angstroms) |           |           |
|------------------|------------------|----------------|-------------------------|-----------|-----------|
|                  |                  |                | X                       | Y         | Z         |
| 1                | 6                | 0              | -1.798822               | 2.661268  | 0.071936  |
| 2                | 6                | 0              | -1.479593               | 1.249932  | 0.378536  |
| 3                | 6                | 0              | -2.709518               | 0.352753  | 0.223402  |
| 4                | 6                | 0              | -0.355843               | 0.768086  | -0.581162 |
| 5                | 9                | 0              | -1.024790               | 1.209551  | 1.688275  |
| 6                | 8                | 0              | -0.384073               | 1.012589  | -1.765719 |
| 7                | 8                | 0              | 0.543735                | 0.044385  | 0.076348  |
| 8                | 6                | 0              | 1.978262                | -1.930709 | -0.097047 |
| 9                | 6                | 0              | 3.482112                | -1.826062 | 0.247429  |
| 10               | 6                | 0              | 4.245989                | -1.765253 | -1.097080 |
| 11               | 6                | 0              | 3.896232                | -0.337667 | -1.621926 |
| 12               | 6                | 0              | 2.982137                | 0.264783  | -0.511164 |
| 13               | 6                | 0              | 3.609111                | -0.368692 | 0.790335  |
| 14               | 6                | 0              | 1.656363                | -0.532668 | -0.680868 |
| 15               | 6                | 0              | 2.825311                | -0.108271 | 2.092529  |
| 16               | 6                | 0              | 5.062328                | 0.064858  | 1.064818  |
| 17               | 7                | 0              | -2.061733               | 3.770816  | -0.138617 |
| 18               | 6                | 0              | -3.392071               | 0.292118  | -0.997208 |
| 19               | 6                | 0              | -4.500884               | -0.538274 | -1.128698 |
| 20               | 6                | 0              | -4.956205               | -1.321075 | -0.057230 |
| 21               | 6                | 0              | 2.834597                | 1.778965  | -0.577022 |
| 22               | 6                | 0              | -6.178637               | -2.195908 | -0.204526 |
| 23               | 6                | 0              | -4.256746               | -1.249831 | 1.152292  |
| 24               | 6                | 0              | -3.142551               | -0.422448 | 1.299331  |
| 25               | 1                | 0              | 1.363366                | -2.112347 | 0.788517  |
| 26               | 1                | 0              | 1.767713                | -2.733205 | -0.811726 |
| 27               | 1                | 0              | 3.828892                | -2.612224 | 0.925894  |
| 28               | 1                | 0              | 3.919758                | -2.555884 | -1.781562 |
| 29               | 1                | 0              | 5.324008                | -1.891382 | -0.958182 |
| 30               | 1                | 0              | 4.791784                | 0.278475  | -1.748348 |
| 31               | 1                | 0              | 3.388985                | -0.353749 | -2.593144 |
| 32               | 1                | 0              | 1.338059                | -0.549377 | -1.723742 |
| 33               | 1                | 0              | 2.940829                | 0.937090  | 2.402573  |
| 34               | 1                | 0              | 3.231277                | -0.729868 | 2.900617  |
| 35               | 1                | 0              | 1.754975                | -0.301500 | 2.020630  |
| 36               | 1                | 0              | 5.101022                | 1.122667  | 1.350292  |
| 37               | 1                | 0              | 5.738048                | -0.071528 | 0.217612  |
| 38               | 1                | 0              | 5.470225                | -0.510295 | 1.905037  |
| 39               | 1                | 0              | -3.050945               | 0.884615  | -1.840423 |
| 40               | 1                | 0              | -5.023239               | -0.578264 | -2.081620 |
| 41               | 1                | 0              | 2.205645                | 2.160686  | 0.234490  |
| 42               | 1                | 0              | 2.381066                | 2.090775  | -1.524795 |
| 43               | 1                | 0              | 3.812061                | 2.268199  | -0.498798 |
| 44               | 1                | 0              | -6.184955               | -2.716517 | -1.168666 |
| 45               | 1                | 0              | -7.099570               | -1.600361 | -0.153485 |
| 46               | 1                | 0              | -6.230425               | -2.949016 | 0.588016  |
| 47               | 1                | 0              | -4.586010               | -1.849929 | 1.997199  |
| 48               | 1                | 0              | -2.614065               | -0.379941 | 2.244362  |

(R)-CFTA ester of **9**

*sp conformer*

| Center<br>Number | Atomic<br>Number | Atomic<br>Type | Coordinates (Angstroms) |           |           |
|------------------|------------------|----------------|-------------------------|-----------|-----------|
|                  |                  |                | X                       | Y         | Z         |
| 1                | 6                | 0              | -2.779569               | -0.274113 | 1.197401  |
| 2                | 6                | 0              | -3.754284               | -1.271705 | 1.196210  |
| 3                | 6                | 0              | -4.584793               | -1.475343 | 0.087615  |
| 4                | 6                | 0              | -4.404148               | -0.650541 | -1.032135 |
| 5                | 6                | 0              | -5.663299               | -2.532434 | 0.105224  |
| 6                | 6                | 0              | -3.433421               | 0.346719  | -1.044878 |
| 7                | 6                | 0              | -2.618101               | 0.541874  | 0.076272  |
| 8                | 6                | 0              | -1.548414               | 1.623868  | -0.004269 |
| 9                | 6                | 0              | -1.055538               | 2.051469  | 1.320255  |
| 10               | 6                | 0              | -0.366326               | 1.122060  | -0.887395 |
| 11               | 9                | 0              | -2.064384               | 2.742624  | -0.639248 |
| 12               | 8                | 0              | -0.234447               | 1.454898  | -2.037977 |
| 13               | 8                | 0              | 0.385019                | 0.263914  | -0.193411 |
| 14               | 7                | 0              | -0.664563               | 2.400931  | 2.354826  |
| 15               | 6                | 0              | 1.622131                | -1.844785 | -0.445534 |
| 16               | 6                | 0              | 3.064983                | -1.960998 | 0.101253  |
| 17               | 6                | 0              | 4.016070                | -1.828757 | -1.111099 |
| 18               | 6                | 0              | 3.884951                | -0.319092 | -1.483188 |
| 19               | 6                | 0              | 2.889485                | 0.250325  | -0.425002 |
| 20               | 6                | 0              | 3.260333                | -0.604239 | 0.848058  |
| 21               | 6                | 0              | 1.527765                | -0.357198 | -0.867343 |
| 22               | 6                | 0              | 2.332988                | -0.415465 | 2.064107  |
| 23               | 6                | 0              | 4.697154                | -0.375556 | 1.357273  |
| 24               | 6                | 0              | 2.905624                | 1.768494  | -0.305578 |
| 25               | 1                | 0              | -2.153750               | -0.131203 | 2.073313  |
| 26               | 1                | 0              | -3.872869               | -1.898449 | 2.076763  |
| 27               | 1                | 0              | -5.033902               | -0.790754 | -1.907501 |
| 28               | 1                | 0              | -6.628143               | -2.106526 | 0.410973  |
| 29               | 1                | 0              | -5.425085               | -3.337432 | 0.807861  |
| 30               | 1                | 0              | -5.805461               | -2.976695 | -0.885769 |
| 31               | 1                | 0              | -3.306412               | 0.978456  | -1.917980 |
| 32               | 1                | 0              | 0.870130                | -2.064642 | 0.316568  |
| 33               | 1                | 0              | 1.439933                | -2.521251 | -1.287167 |
| 34               | 1                | 0              | 3.230586                | -2.858761 | 0.705569  |
| 35               | 1                | 0              | 3.719809                | -2.491371 | -1.931587 |
| 36               | 1                | 0              | 5.045001                | -2.090925 | -0.846778 |
| 37               | 1                | 0              | 4.845813                | 0.200456  | -1.417719 |
| 38               | 1                | 0              | 3.516381                | -0.163734 | -2.503474 |
| 39               | 1                | 0              | 1.361590                | -0.212588 | -1.935140 |
| 40               | 1                | 0              | 2.439170                | 0.593733  | 2.478222  |
| 41               | 1                | 0              | 2.612979                | -1.121596 | 2.855972  |
| 42               | 1                | 0              | 1.274920                | -0.559170 | 1.846003  |
| 43               | 1                | 0              | 4.787654                | 0.615983  | 1.816152  |
| 44               | 1                | 0              | 5.463711                | -0.449259 | 0.582532  |
| 45               | 1                | 0              | 4.941127                | -1.112570 | 2.132077  |
| 46               | 1                | 0              | 2.218739                | 2.122015  | 0.470721  |
| 47               | 1                | 0              | 2.614034                | 2.240601  | -1.251221 |
| 48               | 1                | 0              | 3.909319                | 2.127564  | -0.051339 |

(*R*)-CFTA ester of **9**

*ap conformer*

| Center<br>Number | Atomic<br>Number | Atomic<br>Type | Coordinates (Angstroms) |           |           |
|------------------|------------------|----------------|-------------------------|-----------|-----------|
|                  |                  |                | X                       | Y         | Z         |
| 1                | 6                | 0              | 3.068642                | 0.140868  | -1.016594 |
| 2                | 6                | 0              | 3.880708                | -0.973271 | -1.201160 |
| 3                | 6                | 0              | 4.126624                | -1.877713 | -0.156350 |
| 4                | 6                | 0              | 3.526070                | -1.629542 | 1.081881  |
| 5                | 6                | 0              | 5.020557                | -3.076283 | -0.370083 |
| 6                | 6                | 0              | 2.708713                | -0.515494 | 1.282879  |
| 7                | 6                | 0              | 2.479805                | 0.373425  | 0.232490  |
| 8                | 6                | 0              | 1.576747                | 1.590364  | 0.450400  |
| 9                | 6                | 0              | 2.287321                | 2.850564  | 0.143021  |
| 10               | 6                | 0              | 0.324872                | 1.481213  | -0.464605 |
| 11               | 9                | 0              | 1.184289                | 1.654584  | 1.778712  |
| 12               | 8                | 0              | 0.384269                | 1.714344  | -1.650267 |
| 13               | 8                | 0              | -0.730634               | 1.070596  | 0.230013  |
| 14               | 7                | 0              | 2.858663                | 3.836816  | -0.070123 |
| 15               | 6                | 0              | -3.154265               | 1.405608  | 0.380013  |
| 16               | 6                | 0              | -4.085452               | 0.180084  | 0.533653  |
| 17               | 6                | 0              | -4.712905               | -0.080682 | -0.856198 |
| 18               | 6                | 0              | -3.507117               | -0.639897 | -1.673286 |
| 19               | 6                | 0              | -2.327110               | -0.655061 | -0.653227 |
| 20               | 6                | 0              | -3.077420               | -1.001323 | 0.690578  |
| 21               | 6                | 0              | -1.991717               | 0.854073  | -0.483227 |
| 22               | 6                | 0              | -2.214728               | -0.930016 | 1.966257  |
| 23               | 6                | 0              | -3.745562               | -2.390193 | 0.695169  |
| 24               | 6                | 0              | -1.153144               | -1.529217 | -1.073686 |
| 25               | 1                | 0              | 2.885542                | 0.825191  | -1.839072 |
| 26               | 1                | 0              | 4.334145                | -1.143276 | -2.174923 |
| 27               | 1                | 0              | 3.699265                | -2.315028 | 1.907917  |
| 28               | 1                | 0              | 6.051404                | -2.769199 | -0.586807 |
| 29               | 1                | 0              | 4.680954                | -3.681712 | -1.219100 |
| 30               | 1                | 0              | 5.044540                | -3.720997 | 0.513832  |
| 31               | 1                | 0              | 2.255223                | -0.337454 | 2.250725  |
| 32               | 1                | 0              | -2.768303               | 1.755776  | 1.340880  |
| 33               | 1                | 0              | -3.655568               | 2.253059  | -0.099113 |
| 34               | 1                | 0              | -4.814939               | 0.285667  | 1.343061  |
| 35               | 1                | 0              | -5.125467               | 0.836432  | -1.290396 |
| 36               | 1                | 0              | -5.533242               | -0.802750 | -0.801910 |
| 37               | 1                | 0              | -3.701347               | -1.651981 | -2.042045 |
| 38               | 1                | 0              | -3.269238               | -0.028949 | -2.551413 |
| 39               | 1                | 0              | -1.883978               | 1.346977  | -1.449715 |
| 40               | 1                | 0              | -1.490437               | -1.753387 | 1.981460  |
| 41               | 1                | 0              | -2.852657               | -1.046271 | 2.851493  |
| 42               | 1                | 0              | -1.649841               | -0.004332 | 2.076013  |
| 43               | 1                | 0              | -2.987032               | -3.181485 | 0.721875  |
| 44               | 1                | 0              | -4.387459               | -2.581236 | -0.167705 |
| 45               | 1                | 0              | -4.362382               | -2.505012 | 1.594857  |
| 46               | 1                | 0              | -0.354669               | -1.526746 | -0.324501 |
| 47               | 1                | 0              | -0.722494               | -1.179821 | -2.019576 |
| 48               | 1                | 0              | -1.474203               | -2.566981 | -1.218906 |

(S)-CFTA ester of **10**

*sp conformer*

| Center<br>Number | Atomic<br>Number | Atomic<br>Type | Coordinates (Angstroms) |           |           |
|------------------|------------------|----------------|-------------------------|-----------|-----------|
|                  |                  |                | X                       | Y         | Z         |
| 1                | 6                | 0              | -4.207988               | 0.945801  | -1.073406 |
| 2                | 6                | 0              | -3.385647               | -0.176723 | -1.096242 |
| 3                | 6                | 0              | -4.307498               | 1.751701  | 0.070123  |
| 4                | 6                | 0              | -2.643062               | -0.521101 | 0.039437  |
| 5                | 6                | 0              | -2.725458               | 0.272468  | 1.185197  |
| 6                | 6                | 0              | -1.720468               | -1.731404 | -0.052785 |
| 7                | 6                | 0              | -3.550691               | 1.397122  | 1.193294  |
| 8                | 6                | 0              | -0.441507               | -1.330764 | -0.845041 |
| 9                | 9                | 0              | -2.337102               | -2.735608 | -0.782419 |
| 10               | 6                | 0              | -5.224603               | 2.951472  | 0.093753  |
| 11               | 6                | 0              | -1.368799               | -2.289491 | 1.267887  |
| 12               | 7                | 0              | -1.096842               | -2.736451 | 2.302944  |
| 13               | 8                | 0              | 0.409499                | -0.681992 | -0.049258 |
| 14               | 6                | 0              | 1.608122                | -0.131391 | -0.674158 |
| 15               | 6                | 0              | 2.722684                | -1.188733 | -0.898878 |
| 16               | 6                | 0              | 3.918966                | -0.588942 | -0.121378 |
| 17               | 6                | 0              | 3.624685                | -0.788502 | 1.383003  |
| 18               | 6                | 0              | 2.464406                | 0.220115  | 1.644203  |
| 19               | 6                | 0              | 2.247275                | 0.915602  | 0.268495  |
| 20               | 6                | 0              | 1.472951                | 2.225959  | 0.342362  |
| 21               | 6                | 0              | 3.714894                | 0.948915  | -0.313600 |
| 22               | 6                | 0              | 4.688431                | 1.819273  | 0.501811  |
| 23               | 6                | 0              | 3.830201                | 1.415564  | -1.778685 |
| 24               | 8                | 0              | -0.314955               | -1.544684 | -2.024375 |
| 25               | 1                | 0              | -4.782507               | 1.201609  | -1.960612 |
| 26               | 1                | 0              | -3.316536               | -0.789069 | -1.989198 |
| 27               | 1                | 0              | -2.155591               | 0.013977  | 2.072769  |
| 28               | 1                | 0              | -3.609837               | 2.005098  | 2.092701  |
| 29               | 1                | 0              | -6.261185               | 2.652267  | 0.297762  |
| 30               | 1                | 0              | -5.223289               | 3.475403  | -0.868287 |
| 31               | 1                | 0              | -4.931418               | 3.665242  | 0.870098  |
| 32               | 1                | 0              | 1.276375                | 0.317351  | -1.612008 |
| 33               | 1                | 0              | 2.928092                | -1.319275 | -1.964657 |
| 34               | 1                | 0              | 2.425303                | -2.165634 | -0.504981 |
| 35               | 1                | 0              | 4.891412                | -0.975883 | -0.443197 |
| 36               | 1                | 0              | 4.501851                | -0.564791 | 1.998342  |
| 37               | 1                | 0              | 3.336888                | -1.821692 | 1.603328  |
| 38               | 1                | 0              | 2.734393                | 0.962411  | 2.402279  |
| 39               | 1                | 0              | 1.551425                | -0.269116 | 1.991055  |
| 40               | 1                | 0              | 1.969516                | 2.943686  | 1.005160  |
| 41               | 1                | 0              | 0.462484                | 2.057961  | 0.733299  |
| 42               | 1                | 0              | 1.370959                | 2.692493  | -0.645112 |
| 43               | 1                | 0              | 4.448768                | 2.882620  | 0.381843  |
| 44               | 1                | 0              | 5.713110                | 1.675686  | 0.137577  |
| 45               | 1                | 0              | 4.687607                | 1.601330  | 1.571971  |
| 46               | 1                | 0              | 3.570428                | 2.477005  | -1.871221 |
| 47               | 1                | 0              | 3.199791                | 0.862177  | -2.479096 |
| 48               | 1                | 0              | 4.866061                | 1.306525  | -2.121941 |

(S)-CFTA ester of **10**

*ap conformer*

| Center<br>Number | Atomic<br>Number | Atomic<br>Type | Coordinates (Angstroms) |           |           |
|------------------|------------------|----------------|-------------------------|-----------|-----------|
|                  |                  |                | X                       | Y         | Z         |
| 1                | 6                | 0              | 2.985549                | -0.426427 | -1.300315 |
| 2                | 6                | 0              | 3.892439                | -1.475474 | -1.139195 |
| 3                | 6                | 0              | 4.483445                | -1.743388 | 0.099661  |
| 4                | 6                | 0              | 4.134807                | -0.926816 | 1.186551  |
| 5                | 6                | 0              | 5.476303                | -2.868952 | 0.269229  |
| 6                | 6                | 0              | 3.232557                | 0.122106  | 1.041812  |
| 7                | 6                | 0              | 2.655317                | 0.376005  | -0.208494 |
| 8                | 6                | 0              | 1.654656                | 1.521644  | -0.380474 |
| 9                | 9                | 0              | 1.273741                | 1.621426  | -1.709993 |
| 10               | 6                | 0              | 0.406169                | 1.256140  | 0.503575  |
| 11               | 6                | 0              | 2.250784                | 2.819653  | 0.003193  |
| 12               | 7                | 0              | 2.734647                | 3.837733  | 0.274992  |
| 13               | 8                | 0              | 0.408880                | 1.469767  | 1.694539  |
| 14               | 8                | 0              | -0.583298               | 0.733968  | -0.212259 |
| 15               | 6                | 0              | -1.803813               | 0.391767  | 0.512974  |
| 16               | 6                | 0              | -2.974014               | 0.241246  | -0.487664 |
| 17               | 6                | 0              | -3.483796               | 1.567678  | -1.037694 |
| 18               | 6                | 0              | -2.516847               | -0.771188 | -1.577183 |
| 19               | 6                | 0              | -2.486015               | -2.142302 | -0.834155 |
| 20               | 6                | 0              | -2.901289               | -1.761634 | 0.605976  |
| 21               | 6                | 0              | -3.962061               | -0.637326 | 0.376284  |
| 22               | 6                | 0              | -1.716531               | -0.984387 | 1.226774  |
| 23               | 6                | 0              | -4.463344               | 0.027670  | 1.674068  |
| 24               | 6                | 0              | -5.214508               | -1.101039 | -0.389905 |
| 25               | 1                | 0              | 2.540979                | -0.232279 | -2.269245 |
| 26               | 1                | 0              | 4.144119                | -2.094137 | -1.997186 |
| 27               | 1                | 0              | 4.578043                | -1.114225 | 2.161786  |
| 28               | 1                | 0              | 6.478490                | -2.483210 | 0.495079  |
| 29               | 1                | 0              | 5.551261                | -3.476933 | -0.637543 |
| 30               | 1                | 0              | 5.193190                | -3.530664 | 1.096444  |
| 31               | 1                | 0              | 2.970794                | 0.738808  | 1.896113  |
| 32               | 1                | 0              | -1.975493               | 1.207124  | 1.216935  |
| 33               | 1                | 0              | -4.328009               | 1.417243  | -1.720087 |
| 34               | 1                | 0              | -2.694711               | 2.082916  | -1.597705 |
| 35               | 1                | 0              | -3.813491               | 2.239712  | -0.235992 |
| 36               | 1                | 0              | -1.545976               | -0.491420 | -1.992443 |
| 37               | 1                | 0              | -3.228948               | -0.775615 | -2.408546 |
| 38               | 1                | 0              | -3.183434               | -2.859413 | -1.278516 |
| 39               | 1                | 0              | -1.494859               | -2.607694 | -0.855875 |
| 40               | 1                | 0              | -3.240104               | -2.607468 | 1.213146  |
| 41               | 1                | 0              | -1.804506               | -0.868295 | 2.310317  |
| 42               | 1                | 0              | -0.755748               | -1.471019 | 1.030257  |
| 43               | 1                | 0              | -5.071774               | -0.683467 | 2.245872  |
| 44               | 1                | 0              | -5.103037               | 0.888356  | 1.445287  |
| 45               | 1                | 0              | -3.669622               | 0.378112  | 2.338758  |
| 46               | 1                | 0              | -5.770781               | -1.831919 | 0.209759  |
| 47               | 1                | 0              | -4.998063               | -1.565298 | -1.354605 |
| 48               | 1                | 0              | -5.888031               | -0.255921 | -0.575368 |

(R)-CFTA ester of **10**

*sp conformer*

| Center<br>Number | Atomic<br>Number | Atomic<br>Type | Coordinates (Angstroms) |           |           |
|------------------|------------------|----------------|-------------------------|-----------|-----------|
|                  |                  |                | X                       | Y         | Z         |
| 1                | 6                | 0              | 3.440439                | 1.384397  | 1.238613  |
| 2                | 6                | 0              | 2.702490                | 0.200558  | 1.216686  |
| 3                | 6                | 0              | 4.068584                | 1.871034  | 0.086442  |
| 4                | 6                | 0              | 2.578429                | -0.519625 | 0.027598  |
| 5                | 6                | 0              | 3.194296                | -0.043891 | -1.136958 |
| 6                | 6                | 0              | 1.754245                | -1.796966 | -0.078762 |
| 7                | 6                | 0              | 3.930137                | 1.136391  | -1.100821 |
| 8                | 6                | 0              | 0.425360                | -1.486973 | -0.829372 |
| 9                | 6                | 0              | 1.476435                | -2.418627 | 1.231046  |
| 10               | 6                | 0              | 4.892877                | 3.136102  | 0.120675  |
| 11               | 9                | 0              | 2.433039                | -2.727374 | -0.850074 |
| 12               | 7                | 0              | 1.261171                | -2.918864 | 2.254989  |
| 13               | 8                | 0              | -0.429210               | -0.868862 | -0.013396 |
| 14               | 6                | 0              | -1.715243               | -0.477053 | -0.582038 |
| 15               | 6                | 0              | -1.638211               | 0.823790  | -1.426475 |
| 16               | 6                | 0              | -2.669703               | 1.742263  | -0.727745 |
| 17               | 6                | 0              | -2.023949               | 2.218392  | 0.593403  |
| 18               | 6                | 0              | -2.020891               | 0.922573  | 1.461992  |
| 19               | 6                | 0              | -2.706308               | -0.143881 | 0.558409  |
| 20               | 6                | 0              | -3.211983               | -1.369996 | 1.309110  |
| 21               | 6                | 0              | -3.753786               | 0.729480  | -0.237402 |
| 22               | 6                | 0              | -4.844851               | 1.354276  | 0.650985  |
| 23               | 6                | 0              | -4.484567               | -0.009144 | -1.376418 |
| 24               | 8                | 0              | 0.261226                | -1.741994 | -1.995799 |
| 25               | 1                | 0              | 3.532172                | 1.934830  | 2.171710  |
| 26               | 1                | 0              | 2.231921                | -0.159652 | 2.126656  |
| 27               | 1                | 0              | 3.096356                | -0.601864 | -2.062691 |
| 28               | 1                | 0              | 4.406006                | 1.494280  | -2.010835 |
| 29               | 1                | 0              | 4.747165                | 3.733483  | -0.786035 |
| 30               | 1                | 0              | 5.964633                | 2.907422  | 0.188134  |
| 31               | 1                | 0              | 4.636136                | 3.759181  | 0.983189  |
| 32               | 1                | 0              | -2.052273               | -1.328983 | -1.174834 |
| 33               | 1                | 0              | -1.881786               | 0.625589  | -2.473649 |
| 34               | 1                | 0              | -0.629496               | 1.248301  | -1.403615 |
| 35               | 1                | 0              | -3.039862               | 2.553040  | -1.363814 |
| 36               | 1                | 0              | -2.606436               | 3.018353  | 1.061234  |
| 37               | 1                | 0              | -1.016006               | 2.613623  | 0.428083  |
| 38               | 1                | 0              | -2.588557               | 1.051850  | 2.388895  |
| 39               | 1                | 0              | -1.014967               | 0.608833  | 1.749558  |
| 40               | 1                | 0              | -3.926620               | -1.089704 | 2.091229  |
| 41               | 1                | 0              | -2.381899               | -1.897161 | 1.793487  |
| 42               | 1                | 0              | -3.708840               | -2.080852 | 0.637476  |
| 43               | 1                | 0              | -5.539308               | 0.584248  | 1.007213  |
| 44               | 1                | 0              | -5.432654               | 2.076384  | 0.070996  |
| 45               | 1                | 0              | -4.457231               | 1.876931  | 1.528142  |
| 46               | 1                | 0              | -5.124921               | -0.802766 | -0.973756 |
| 47               | 1                | 0              | -3.821807               | -0.467120 | -2.115028 |
| 48               | 1                | 0              | -5.136188               | 0.688413  | -1.916249 |



(R)-CFTA ester of **10**

*ap conformer*

| Center<br>Number | Atomic<br>Number | Atomic<br>Type | Coordinates (Angstroms) |           |           |
|------------------|------------------|----------------|-------------------------|-----------|-----------|
|                  |                  |                | X                       | Y         | Z         |
| 1                | 6                | 0              | -3.315899               | 0.154475  | 1.033243  |
| 2                | 6                | 0              | -4.263195               | -0.855072 | 1.174694  |
| 3                | 6                | 0              | -4.615495               | -1.679818 | 0.095778  |
| 4                | 6                | 0              | -3.979218               | -1.464046 | -1.131374 |
| 5                | 6                | 0              | -5.666489               | -2.752810 | 0.254786  |
| 6                | 6                | 0              | -3.027069               | -0.455895 | -1.288690 |
| 7                | 6                | 0              | -2.695886               | 0.357857  | -0.205097 |
| 8                | 6                | 0              | -1.641927               | 1.454819  | -0.371464 |
| 9                | 6                | 0              | -2.182851               | 2.782945  | -0.010265 |
| 10               | 6                | 0              | -0.419051               | 1.140414  | 0.532781  |
| 11               | 9                | 0              | -1.235473               | 1.524373  | -1.695909 |
| 12               | 8                | 0              | -0.417864               | 1.382174  | 1.718152  |
| 13               | 8                | 0              | 0.541096                | 0.542331  | -0.162903 |
| 14               | 7                | 0              | -2.623950               | 3.825208  | 0.241850  |
| 15               | 6                | 0              | 1.728677                | 0.123279  | 0.575607  |
| 16               | 6                | 0              | 2.504280                | -0.924982 | -0.257641 |
| 17               | 6                | 0              | 1.844954                | -2.298308 | -0.279706 |
| 18               | 6                | 0              | 2.743434                | -0.301523 | -1.663149 |
| 19               | 6                | 0              | 3.799988                | 0.817581  | -1.407868 |
| 20               | 6                | 0              | 4.024882                | 0.735131  | 0.119892  |
| 21               | 6                | 0              | 3.933819                | -0.798770 | 0.401597  |
| 22               | 6                | 0              | 2.742707                | 1.279185  | 0.794305  |
| 23               | 6                | 0              | 3.996171                | -1.167049 | 1.897937  |
| 24               | 6                | 0              | 5.020755                | -1.632561 | -0.300938 |
| 25               | 1                | 0              | -3.051891               | 0.777942  | 1.882049  |
| 26               | 1                | 0              | -4.738513               | -1.004555 | 2.141255  |
| 27               | 1                | 0              | -4.230563               | -2.092433 | -1.982453 |
| 28               | 1                | 0              | -6.675800               | -2.320797 | 0.253805  |
| 29               | 1                | 0              | -5.548222               | -3.292644 | 1.200950  |
| 30               | 1                | 0              | -5.620921               | -3.482459 | -0.559783 |
| 31               | 1                | 0              | -2.546226               | -0.302526 | -2.247578 |
| 32               | 1                | 0              | 1.369754                | -0.289986 | 1.519460  |
| 33               | 1                | 0              | 2.428173                | -3.010078 | -0.874961 |
| 34               | 1                | 0              | 0.843094                | -2.240798 | -0.721127 |
| 35               | 1                | 0              | 1.738494                | -2.711323 | 0.730757  |
| 36               | 1                | 0              | 1.814094                | 0.084170  | -2.088079 |
| 37               | 1                | 0              | 3.117914                | -1.063936 | -2.353723 |
| 38               | 1                | 0              | 4.725714                | 0.635036  | -1.962722 |
| 39               | 1                | 0              | 3.440297                | 1.807798  | -1.706770 |
| 40               | 1                | 0              | 4.943537                | 1.221106  | 0.464512  |
| 41               | 1                | 0              | 2.875697                | 1.486072  | 1.859530  |
| 42               | 1                | 0              | 2.393829                | 2.204995  | 0.326222  |
| 43               | 1                | 0              | 5.002633                | -0.972734 | 2.287613  |
| 44               | 1                | 0              | 3.794599                | -2.235220 | 2.042765  |
| 45               | 1                | 0              | 3.295396                | -0.613342 | 2.527797  |
| 46               | 1                | 0              | 6.008665                | -1.369729 | 0.096690  |
| 47               | 1                | 0              | 5.055773                | -1.493589 | -1.383594 |
| 48               | 1                | 0              | 4.870017                | -2.701943 | -0.110957 |
